# Supplementary material for: Hypoallergenic acid-sensitive modification preserves major mugwort allergen fold and delivers full repertoire of MHC class II-binding peptides during endolysosomal degradation
Source: Royal Society of Chemistry journal article supplement (doi:10.1039/c6ra17261j), 2016-01-01
Supplement: c6ra17261j1.pdf [file c6ra17261j1.pdf]

## Electronic Supplementary Information

### **Hypoallergenic acid-sensitive modification preserves major mugwort allergen fold and delivers full repertoire of MHC class II-binding peptides during endolysosomal degradation**

Dragana Stanic-Vucinic<sup>1</sup>, Marija Stojadinovic<sup>1,2</sup>, Ivana Mirkov<sup>3</sup>, Danijela Apostolovic<sup>4</sup>, Lidija Burazer<sup>5</sup>, Marina Atanaskovic-Markovic<sup>6,7</sup>, Milena Kataranovski<sup>3,8</sup> and Tanja Cirkovic Velickovic<sup>1,2\*</sup>

<sup>1</sup> University of Belgrade, Faculty of Chemistry, Center of Excellence for Molecular Food Sciences, Studentski trg 16, Belgrade, Serbia

<sup>2</sup> University of Belgrade, Faculty of Chemistry, Department of Biochemistry, Studentski trg 16, Belgrade, Serbia

<sup>3</sup>Institute for Biological Research “Sinisa Stankovic”, University of Belgrade, Bulevar despota Stefana 142, Belgrade, Serbia

<sup>4</sup>Innovation Center, Faculty of Chemistry Ltd, Studentski trg 16, Belgrade, Serbia

<sup>5</sup> Institute of Virology, Vaccines and Sera – Torlak, Vojvode Stepe 458, Belgrade, Serbia

<sup>6</sup>University Children’s Hospital “Tirsova”, Department of Allergology and Pulmology, University of Belgrade, Tirsova 10, Belgrade, Serbia

<sup>7</sup>University of Belgrade, School of Medicine, Dr Subotica 8, Belgrade, Serbia

<sup>8</sup>University of Belgrade, Faculty of Biology, Studentski trg 16, Belgrade, Serbia

**A)**

OB1222 #2579-3334 RT: 41.83-49.88 AV: 574 NL: 1.42E5  
T: FTMS + p NSI Full ms [300.00-3000.00]

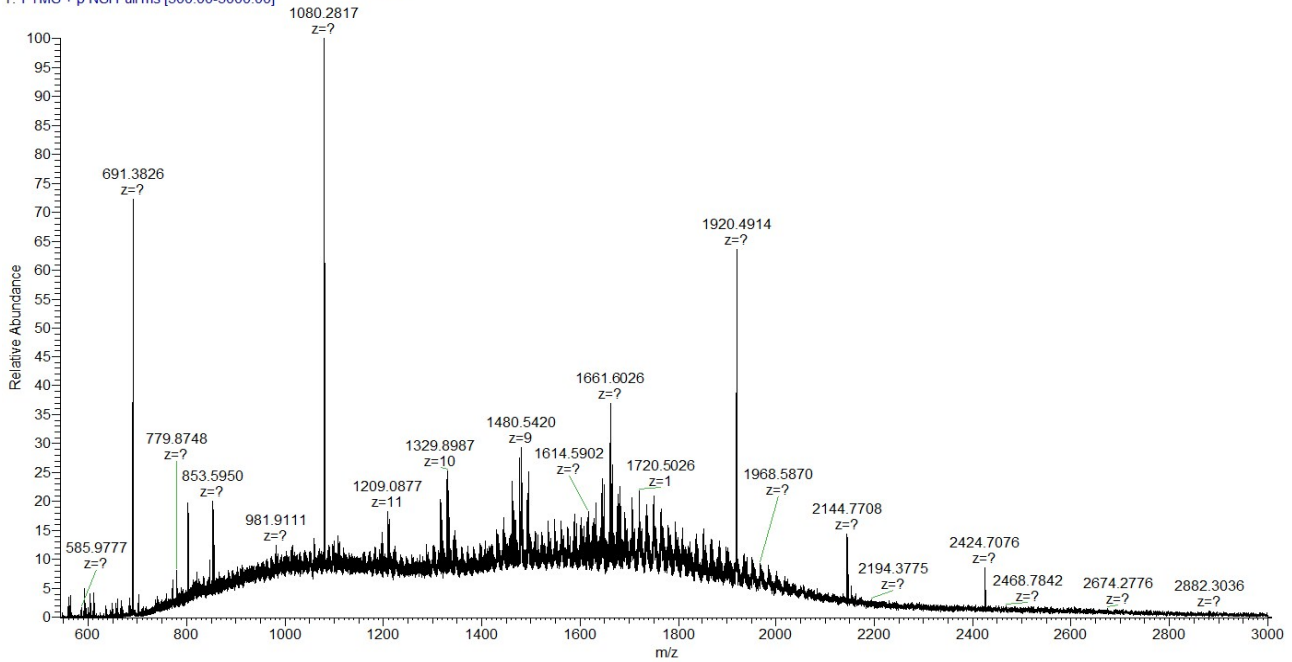

**B)**

OB1222 #2625-2698 RT: 42.46-43.27 AV: 47 NL: 7.61E4  
T: FTMS + p NSI Full ms [300.00-3000.00]

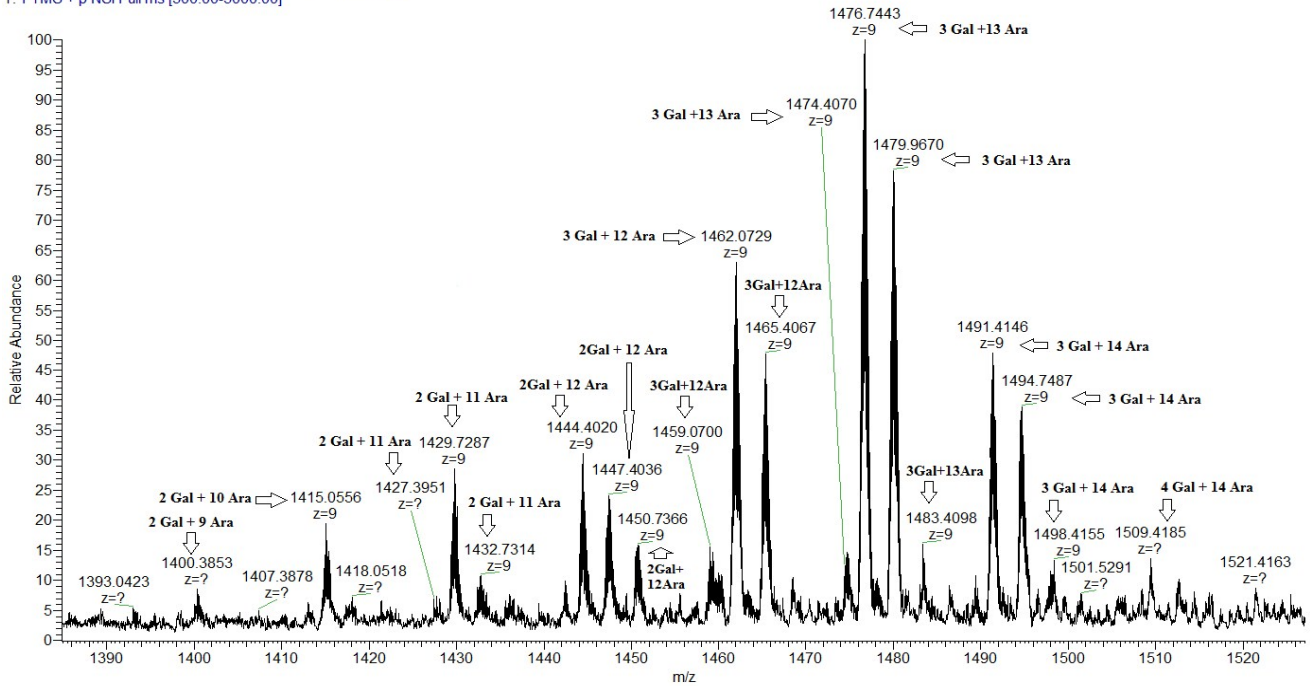

**Figure S1.** ESI-MS spectra of intact Art v 1. ESI-MS spectra at retention time (A) 41.83-49.88 and (B) 42.46-43.27seconds.

In mass spectra of native Art v 1 we have succeeded to resolve only few isoforms which are the most dominant individual isoforms in comparison to the rest of isoforms. Due to the extreme diversity, the rest of isoforms are represented individually in very low concentrations and therefore cannot be resolved from each other. According to the masses of resolved isoforms, ranging 12.5-13.5 kDa, they belong to Art v 1 fraction appearing as smaller set of peaks around 13 when analyzed by MALDI mass spectrometry.<sup>2</sup> In the study of Himly et al.<sup>1</sup> it was proposed that shorter set of isoforms (about 13 kDa) contain one short chain of arabinogalactan, while longer set of isoforms (14-16 kDa) contain longer one, or two, the same or different, arabinogalactan chains. From obtained mass signals with nArt v 1, they easily matched experimental masses in the range of 14-16 kDa with calculated molecular weights of Art v 1 proteins with one or two arabinogalactosyl chains, but they could not match obtained masses in the range 12.7-13.5 kDa with any of the calculated masses. However, in their further study these authors<sup>2</sup> proposed two models of glycan on Art v 1, the simple version having solely  $\beta$ -arabinose residues, which give a mass of 13 kDa, and the complex version, equipped additionally with an arabinogalactan polysaccharide resulting in a mass of 15 kDa. In contrast to their model, we have found isoforms (12.5-13.5 kDa) which contained arabinogalactan. Our isoforms contained 2-4 galactose, with far the most dominant glycans containing 3 galactose. These results are in accordance to the findings of these authors who detected dominant mass of trigalactosyl-Hyp and smaller peaks of additional di- and tetra-galactosyl series after basic and limited acid hydrolysis of native Art v.<sup>2</sup> Our detected isoforms with 3 galactosyl residues contained in addition 12, 13 and 14 of arabinose residues, while for di-galactosyl and tetra-galactosyl series the number of arabinose was found to be 9-12 and 14, respectively. In comparison to MALDI-TOF, nLC -LTQ-Orbitrap method can much better provide resolved individual masses of such complex mixture of isoforms, not only averaged masses. For example, peaks originating from isoforms with the same glycan composition, but with small amino acid variations are resolved by nLC -LTQ-Orbitrap mass spectrometry (Fig S1). According to all these data it can be concluded that shorter Art v 1 isoforms (12.5-13.5 kDa) can bear arabinogalactan chain containing 2-4 galactose, with far dominant tri-galactosyl series. Of course, short isoforms containing solely  $\beta$ -arabinose are possibly present in non-resolved part of mass spectra and their existence cannot be excluded.

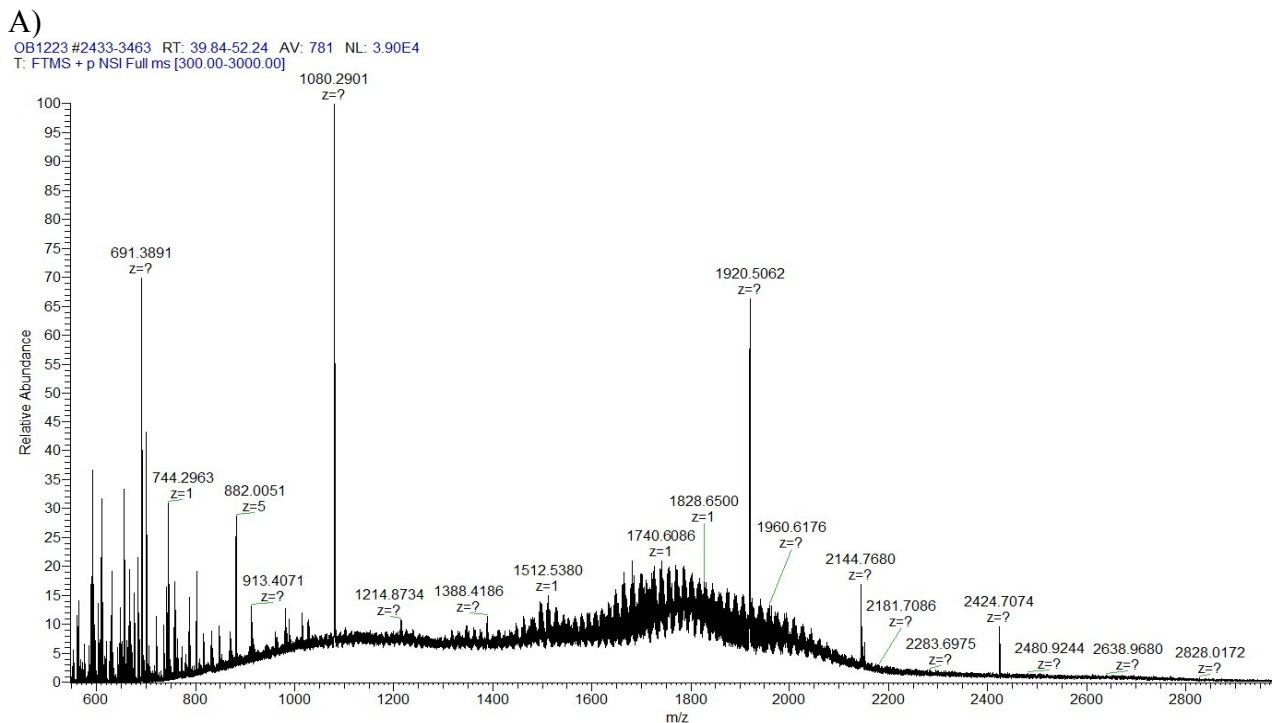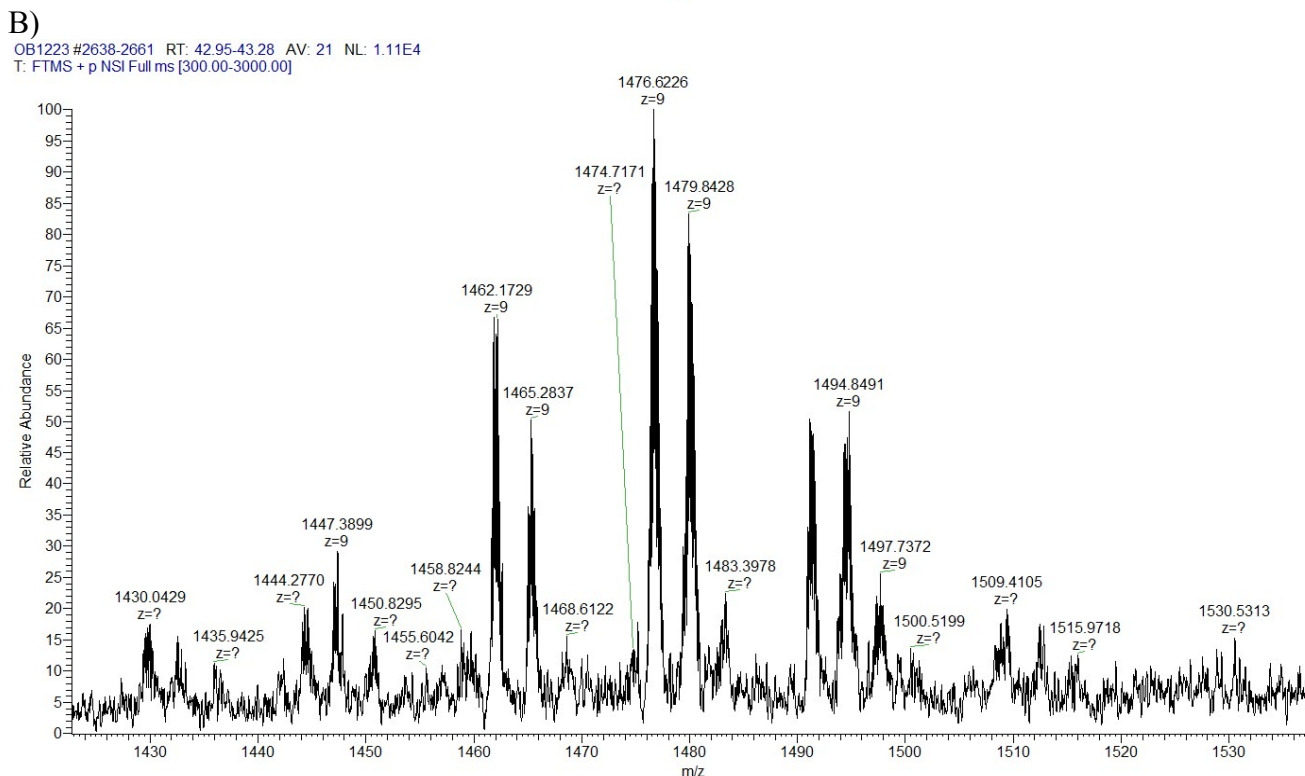

**Figure S2.** ESI-MS spectra of intact CAA. ESI-MS spectra at retention time (A) 39.84-52.24 and (B) 42.95-43.28 seconds. It has to be mentioned that, due to experimental conditions used during sample preparation and MS analysis, acyl groups of CAA were hydrolysed (1% formic acid) resulting in isoform profile identical to unmodified Art v 1.

A)

OB1196 #2320-3644 RT: 39.90-52.00 AV: 655 NL: 1.57E5  
T: FTMS + p NSI Full ms [300.00-3000.00]

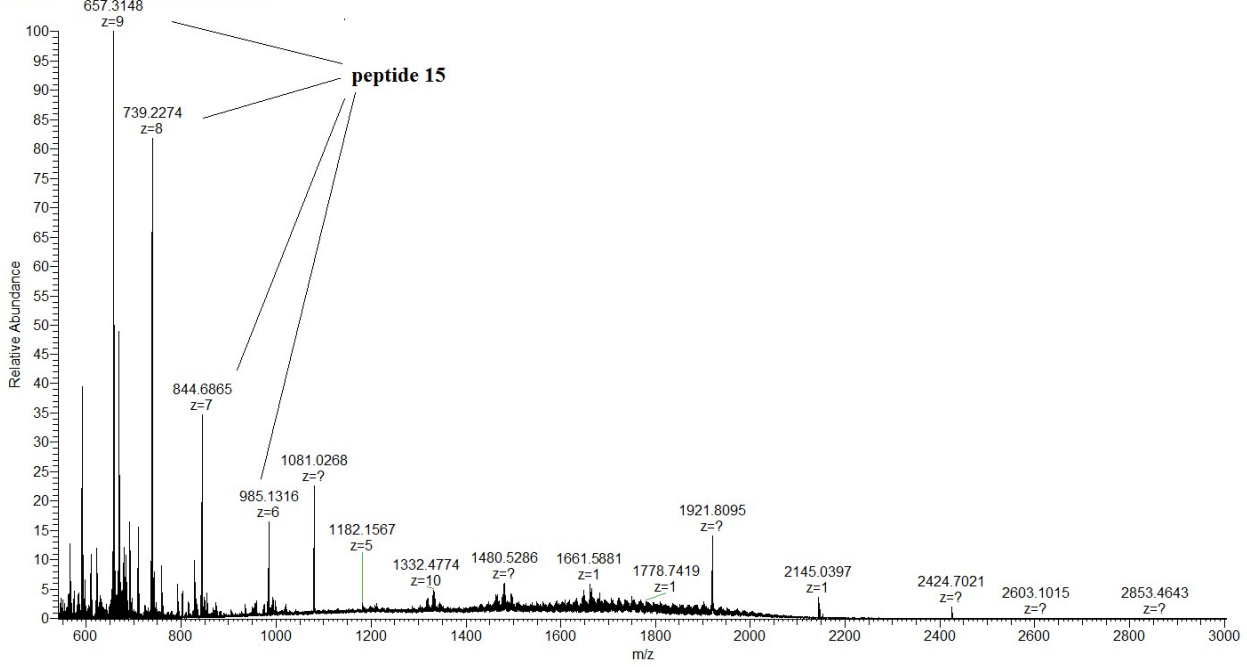

B)

OB1196 #2320-3644 RT: 39.90-52.00 AV: 655 NL: 1.57E5  
T: FTMS + p NSI Full ms [300.00-3000.00]

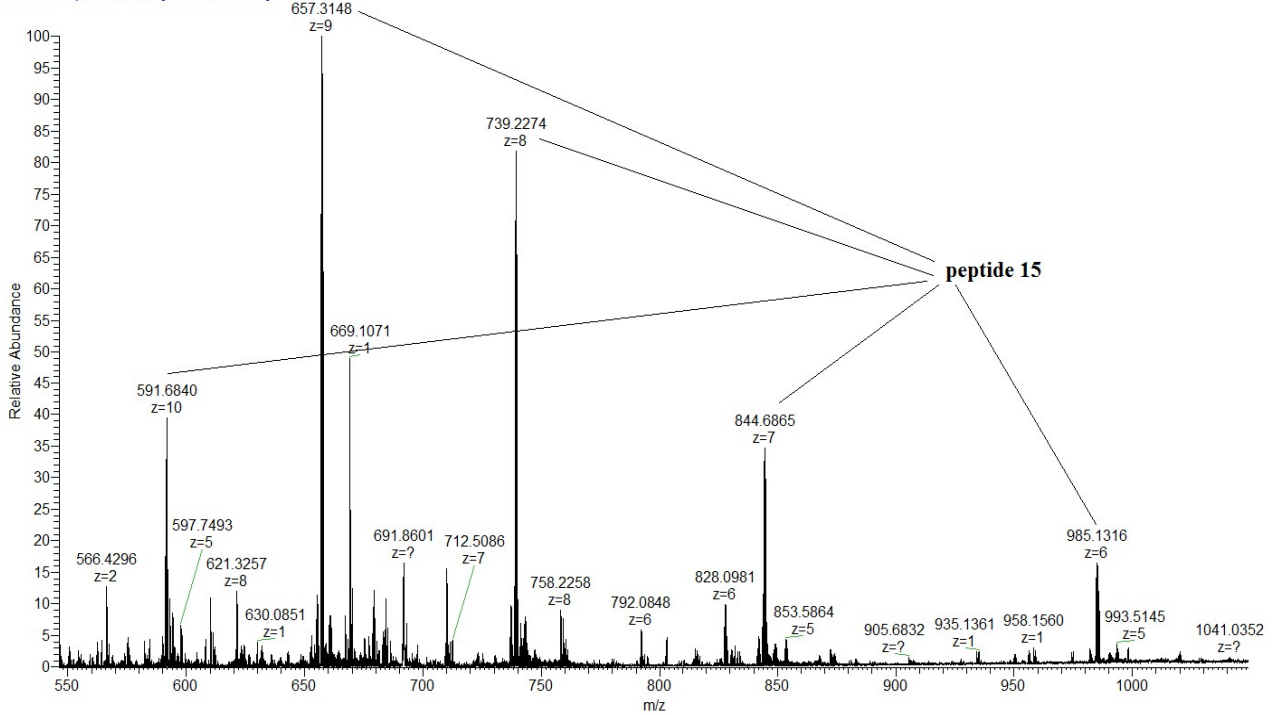

C)

OB1196 #2462.2500 RT: 41.72-42.09 AV: 20 NL: 8.15E3  
T: FTMS + p NSI Full ms [300.00-3000.00]

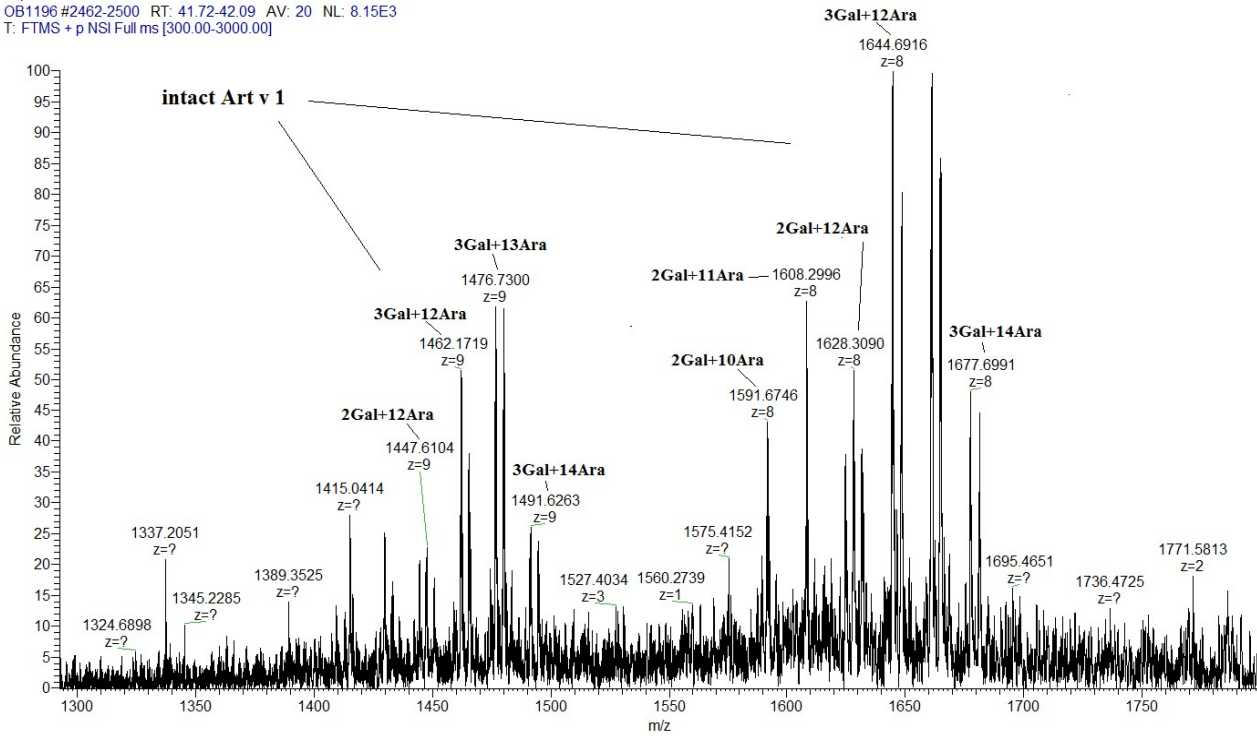

D)

OB1196 #3893.4164 RT: 55.81-59.91 AV: 264 NL: 7.40E2  
T: FTMS + p NSI Full ms [300.00-3000.00]

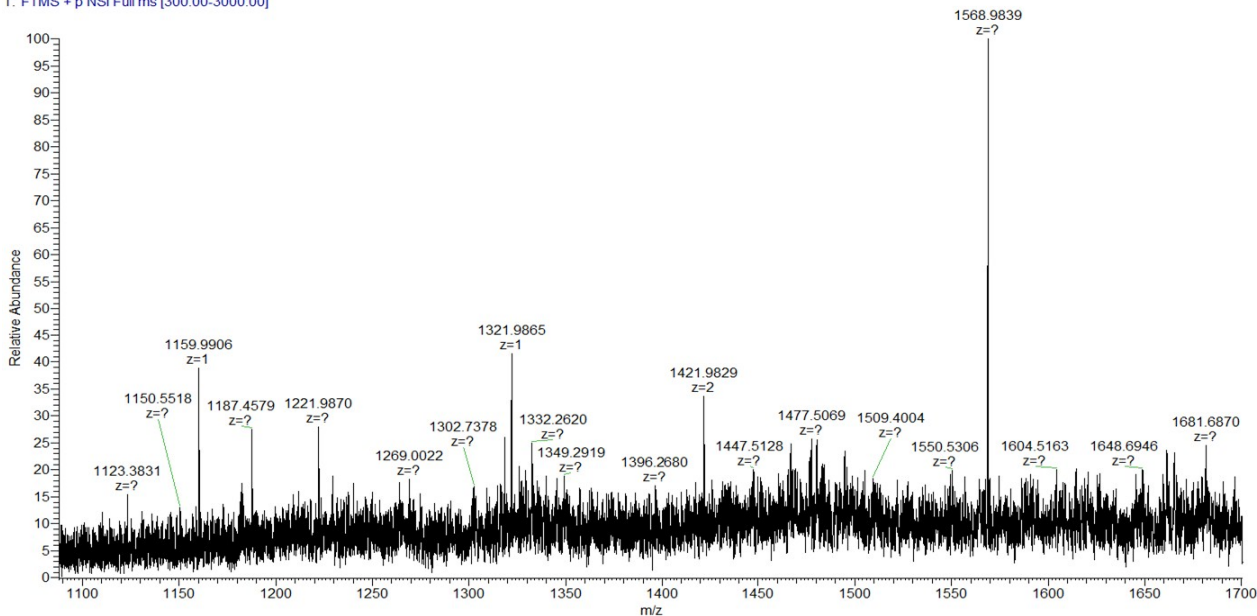

**Figure S3.** ESI-MS spectra of Art v 1 peptides released during 15 min of endolysosomal processing. ESI-MS spectra at retention time (A) 39.90-52.00, (B) 39.90-52.00 zoom out, (C) 41.72-42.09 and (D) 55.81-59.91 seconds. At 15 minute point, in Art v 1 sample far the most dominant peptide is peptide 15 (5909 Da). Therefore, it definitely originate from invariable part of all Art v 1 isoforms, e.g. defensin domen, and actually it consists of the whole defensin domen with additional starting N-terminal tripeptide. The most dominant individual isoforms of intact Art v 1 are still present.

A)

OB1201 #2284-3680 RT: 39.65-52.05 AV: 689 NL: 2.97E5  
T: FTMS + p NSI Full ms [300.00-3000.00]

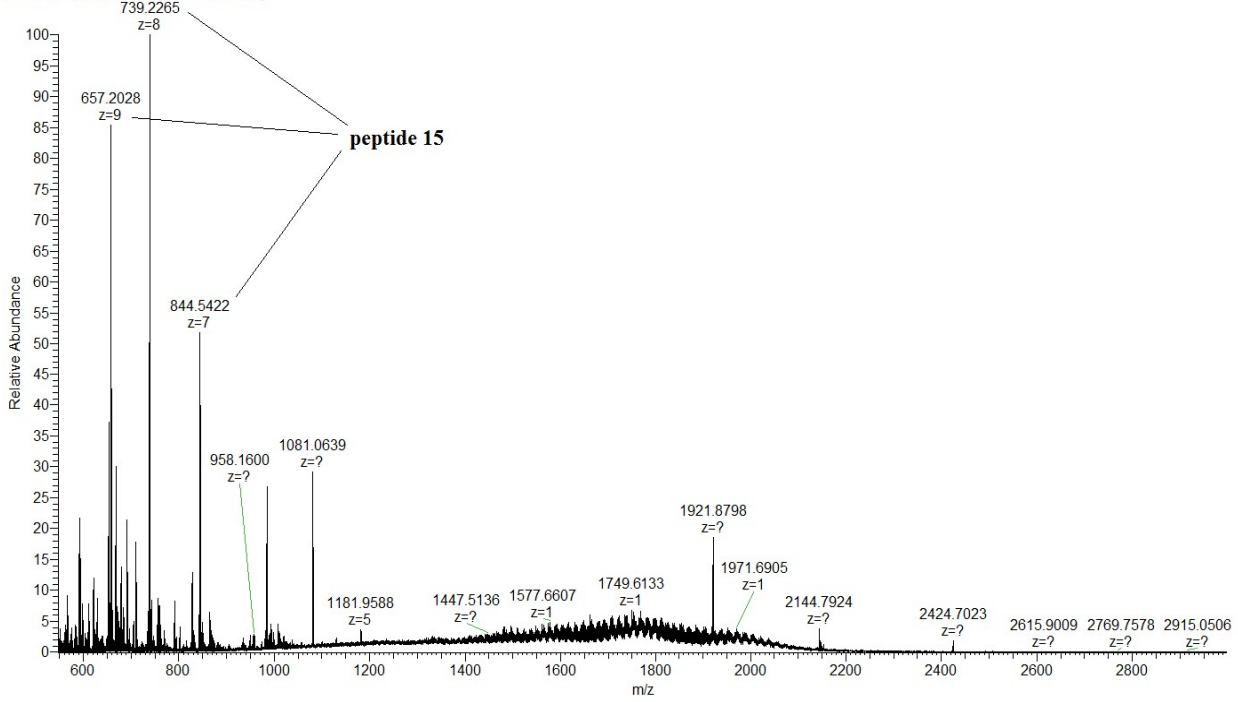

B)

OB1201 #2284-3680 RT: 39.65-52.05 AV: 689 NL: 2.97E5  
T: FTMS + p NSI Full ms [300.00-3000.00]

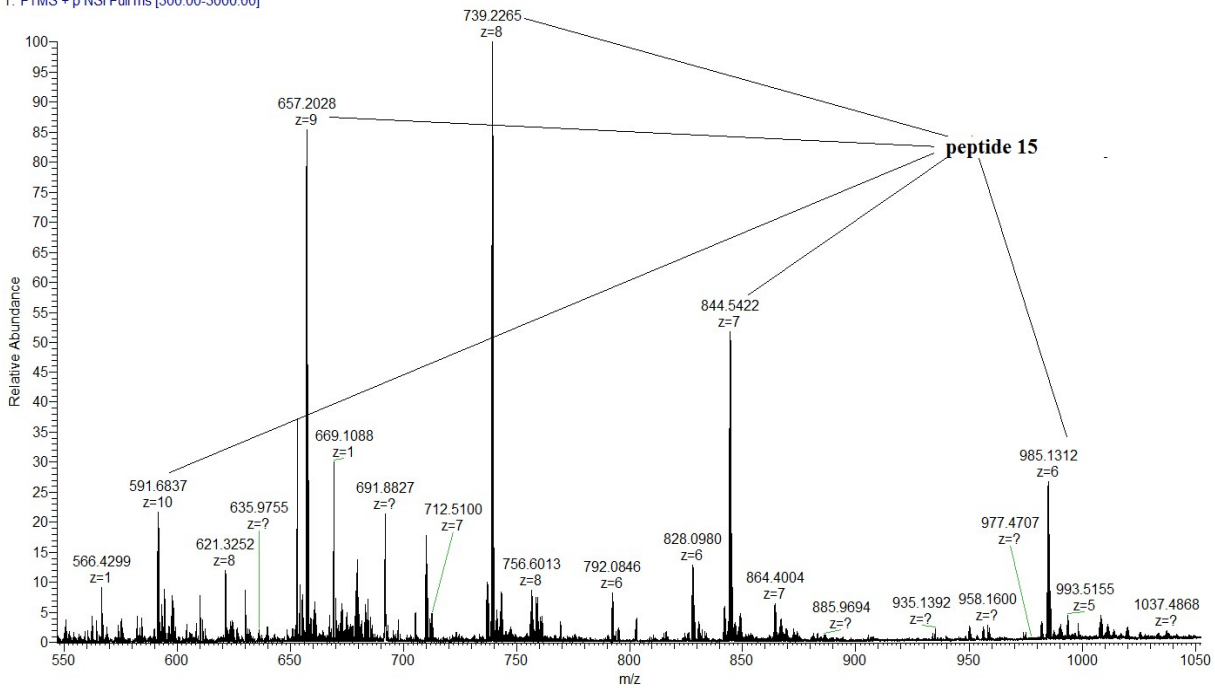

C)

OB1201 #2593-2632 RT: 43.40-43.77 AV: 18 NL: 6.43E3  
T: FTMS + p NSI Full ms [300.00-3000.00]

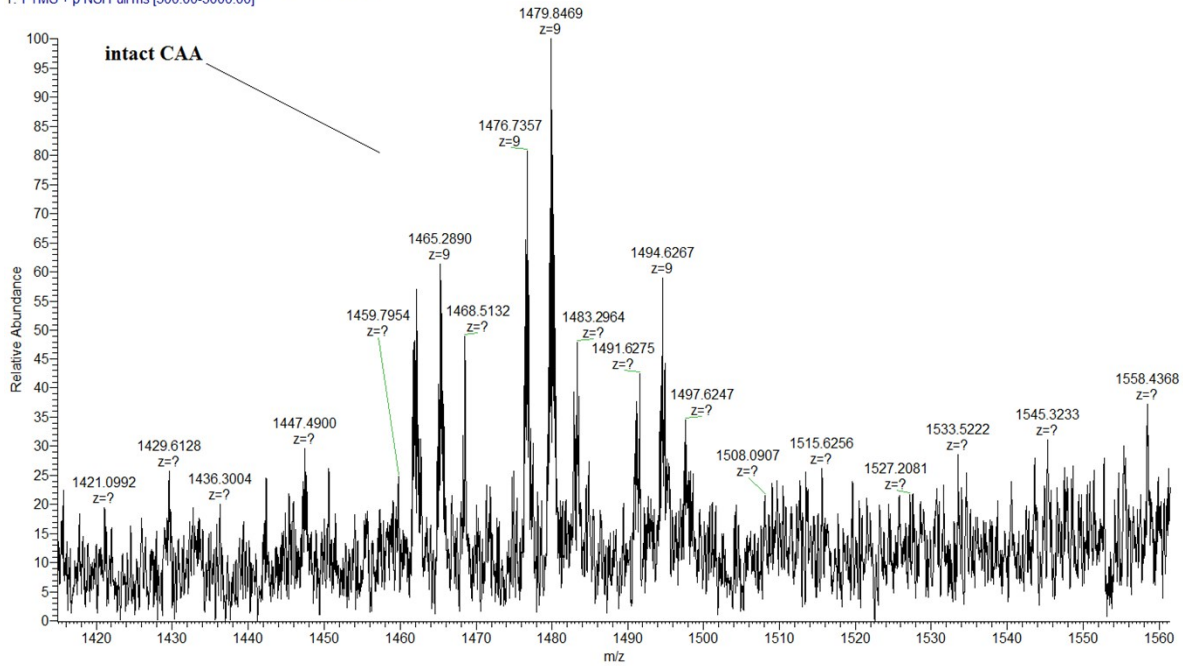

D)

OB1201 #3971-4230 RT: 55.99-59.93 AV: 258 NL: 7.61E2  
T: FTMS + p NSI Full ms [300.00-3000.00]

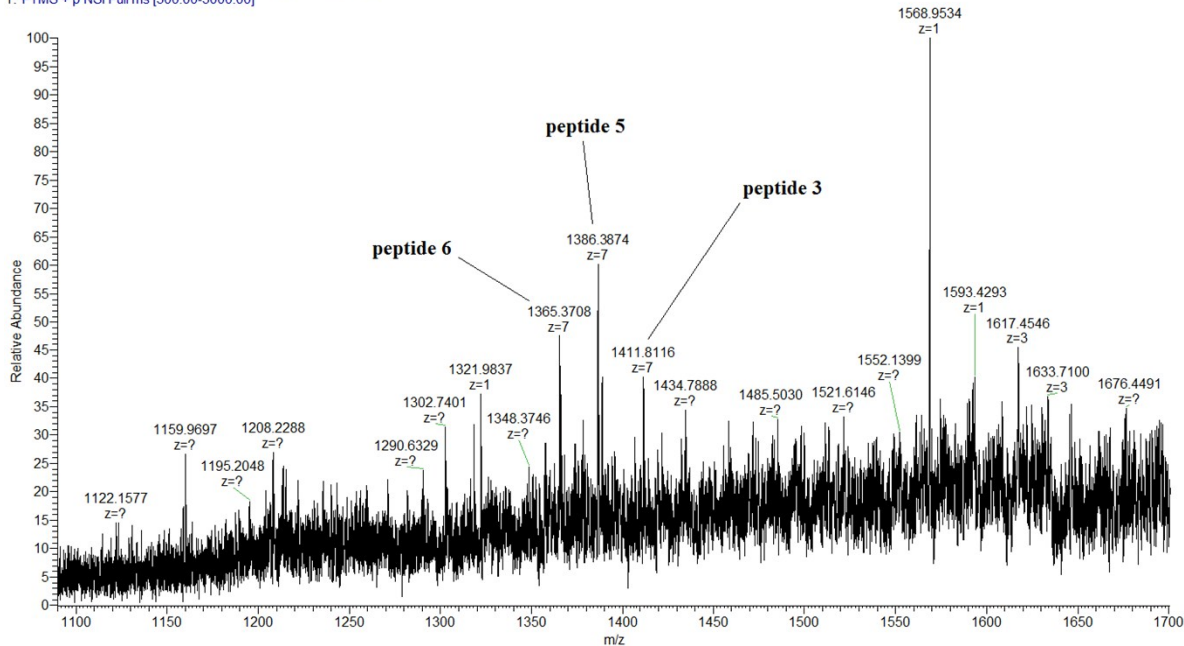

**Figure S4.** ESI-MS spectra of CAA peptides released during 15 min of endolysosomal processing. ESI-MS spectra at retention time (A) 39.65-52.05, (B) 39.65-52.05 zoom out, (C) 43.40-43.77 and (D) 55.99-59.93 seconds. Similarly to Art v 1 sample, in CAA sample peptide 15 (5909 Da) is also far the most dominant at 15 minute point and the most dominant individual isoforms of intact CAA are still present. Also, CAA shortened by part of hydroxyproline domen (peptides 3, 5 and 6) are also present.



A)

OB1197 #2419-3967 RT: 39.91-52.30 AV: 649 NL: 2.01E5  
T: FTMS + p NSI Full ms [300.00-3000.00]

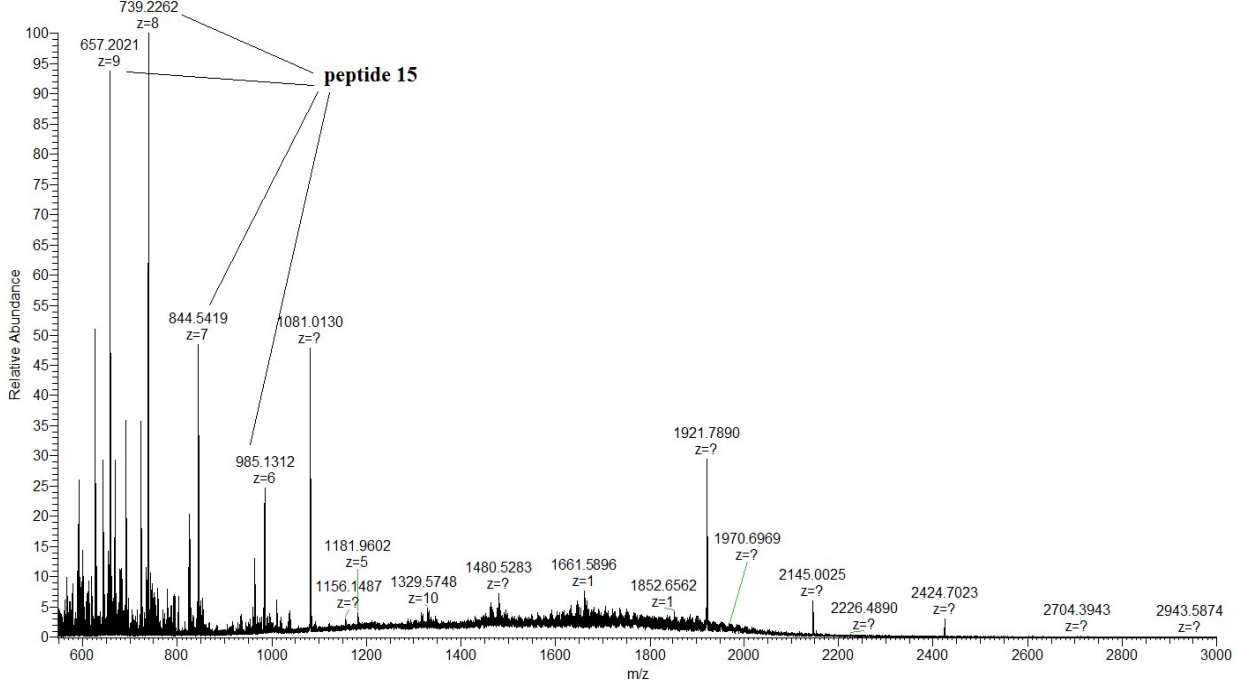

B)

OB1197 #2419-3967 RT: 39.91-52.30 AV: 649 NL: 2.01E5  
T: FTMS + p NSI Full ms [300.00-3000.00]

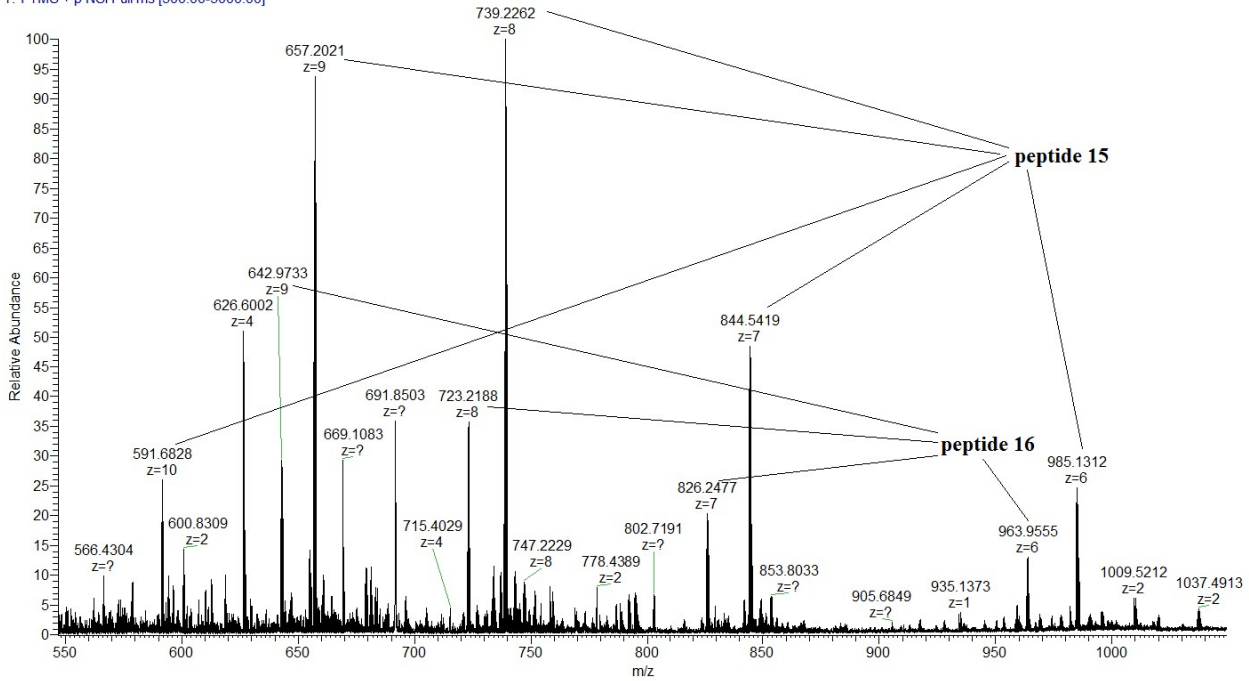

C)

OB1197 #2620-2651 RT: 41.97-42.20 AV: 10 NL: 8.93E3  
T: FTMS + p NSI Full ms [300.00-3000.00]

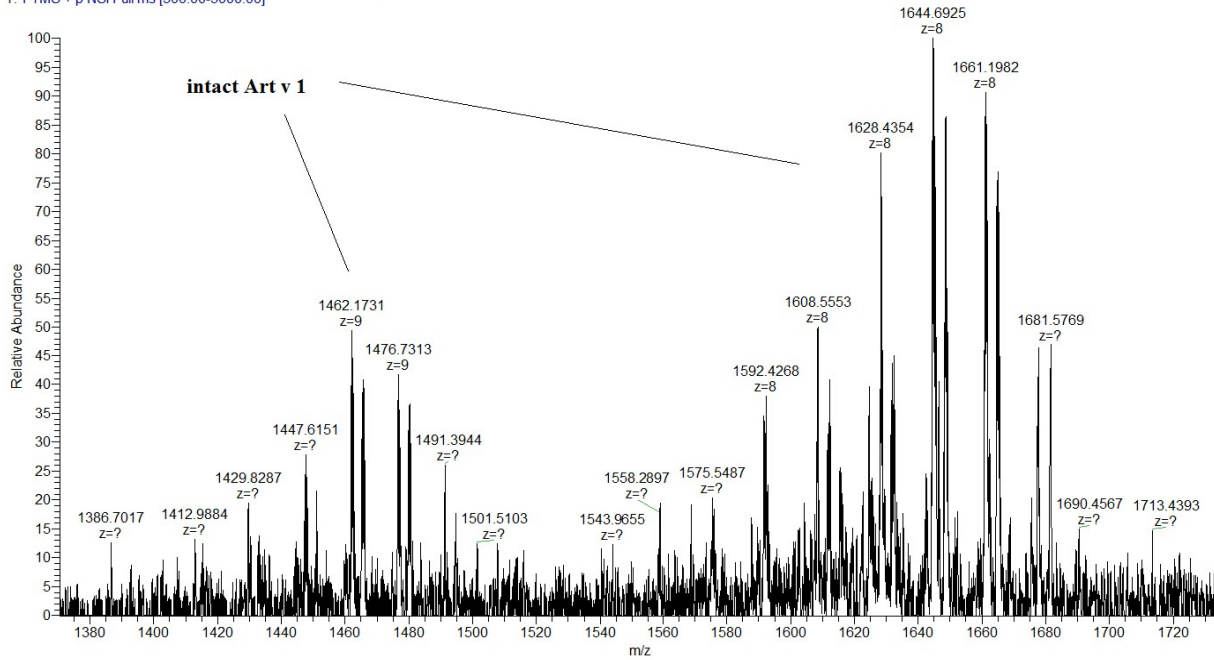

D)

OB1197 #4220-4486 RT: 56.05-60.11 AV: 260 NL: 2.20E3  
T: FTMS + p NSI Full ms [300.00-3000.00]

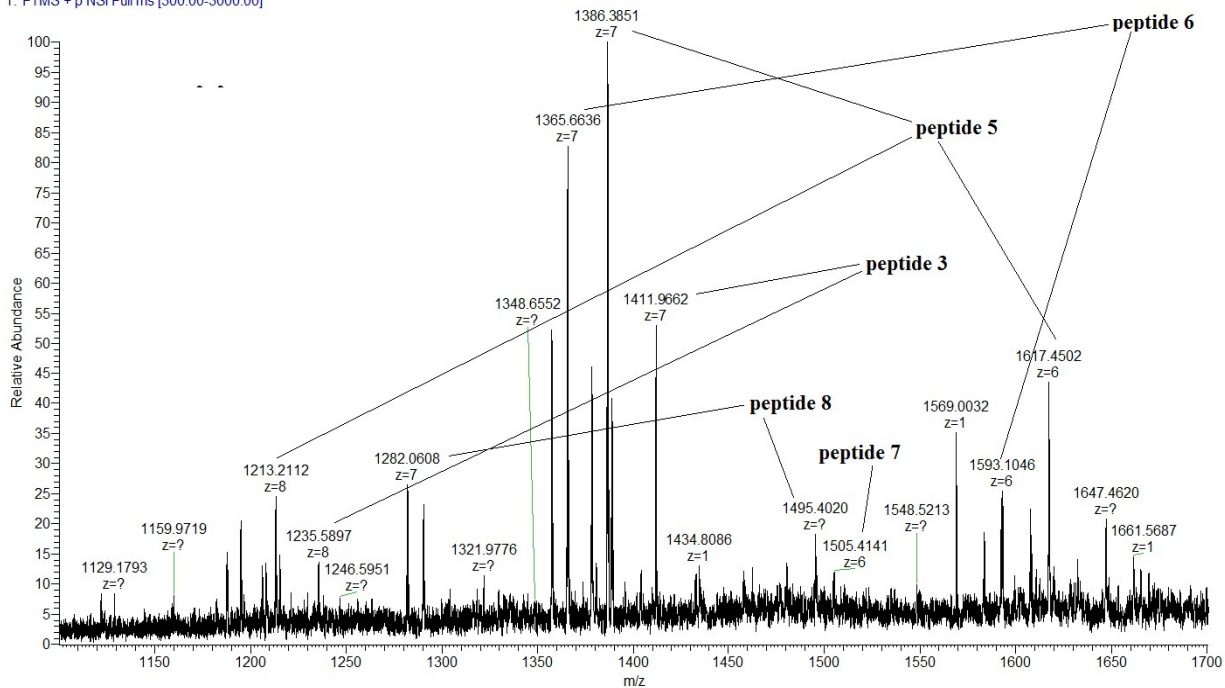

**Figure S5.** ESI-MS spectra of Art v 1 peptides released during 3 h of endolysosomal processing. ESI-MS spectra at retention time (A) 39.91-52.30, (B) 39.91-52.30 zoom out, (C) 41.97-42.20 and (D) 56.05-60.11 seconds. After 3h of degradation peptide 15 is still the most dominant, but appearance of abundant peptide 16 (5781 Da) can be also observed. Peptide 16 is peptide 15 shortened by starting N-terminal dipeptide Ala-Gly. Dominant isoforms of intact Art v 1 are still present. In addition to peptides 3, 5 and 6, shorted peptides (peptides 7 and 8) appear.

A)

OB1202 #2357-3688 RT: 39.91-50.75 AV: 607 NL: 2.09E5  
T: FTMS + p NSI Full ms [300.00-3000.00]

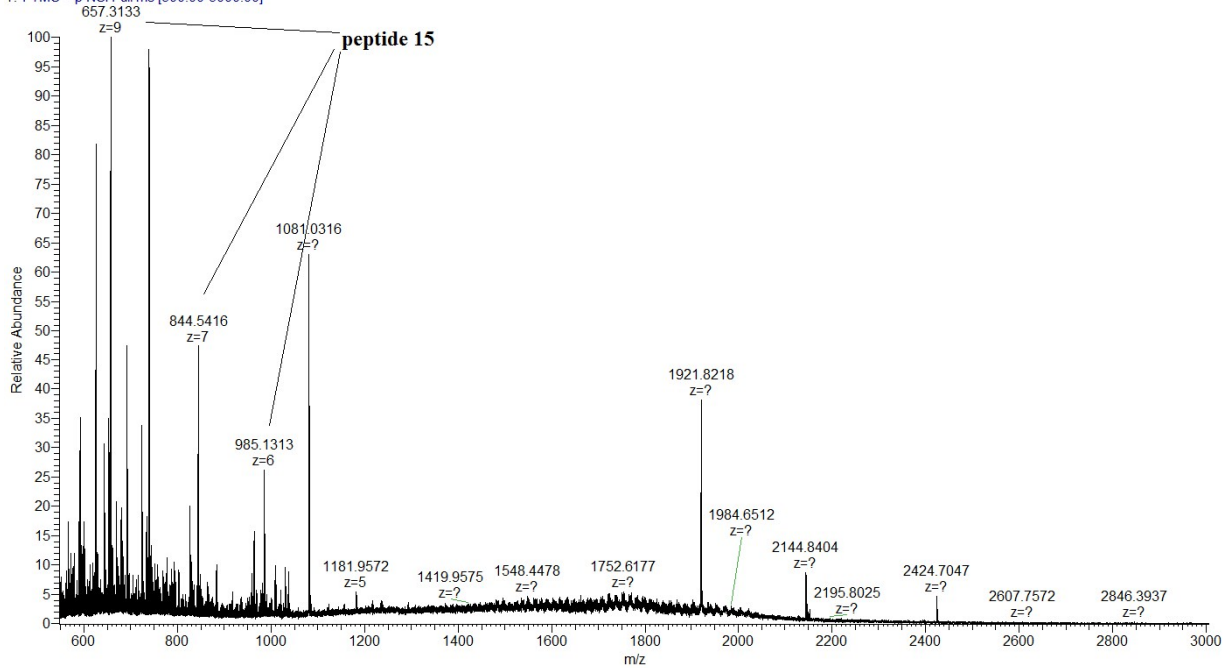

B)

OB1202 #2357-3688 RT: 39.91-50.75 AV: 607 NL: 2.09E5  
T: FTMS + p NSI Full ms [300.00-3000.00]

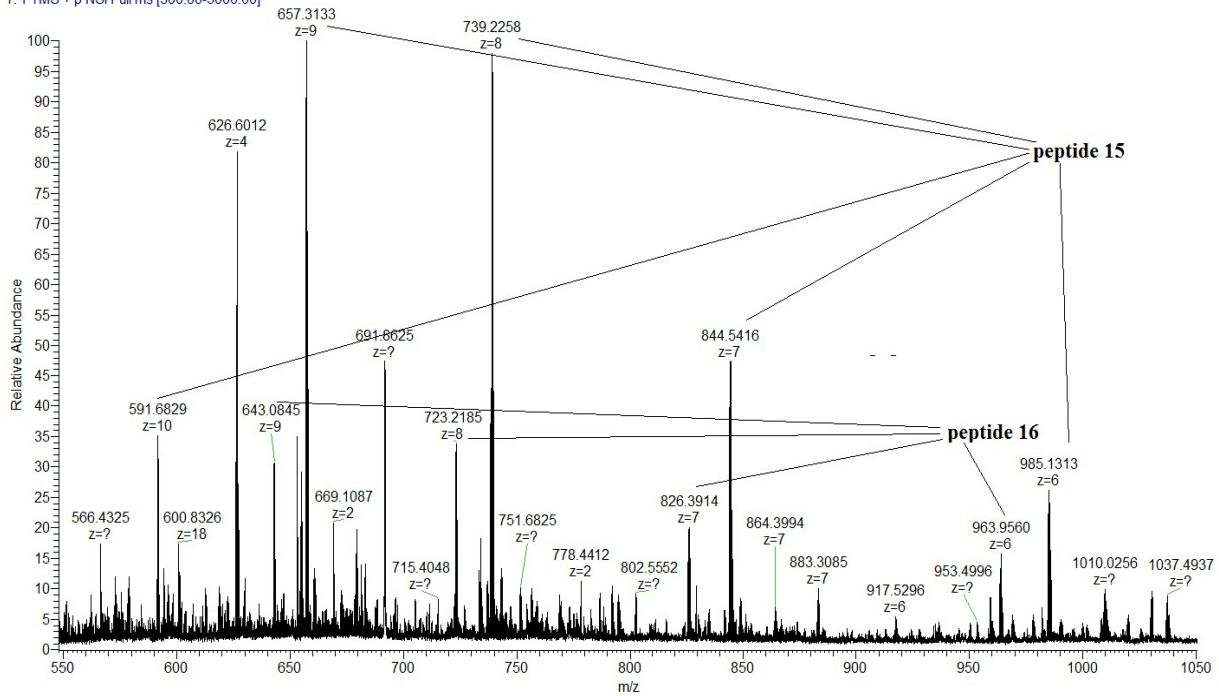

C)

OB12002 #2519-2588 RT: 41.64-42.33 AV: 34 NL: 4.03E2  
T: FTMS + p NSI Full ms [300.00-3000.00]

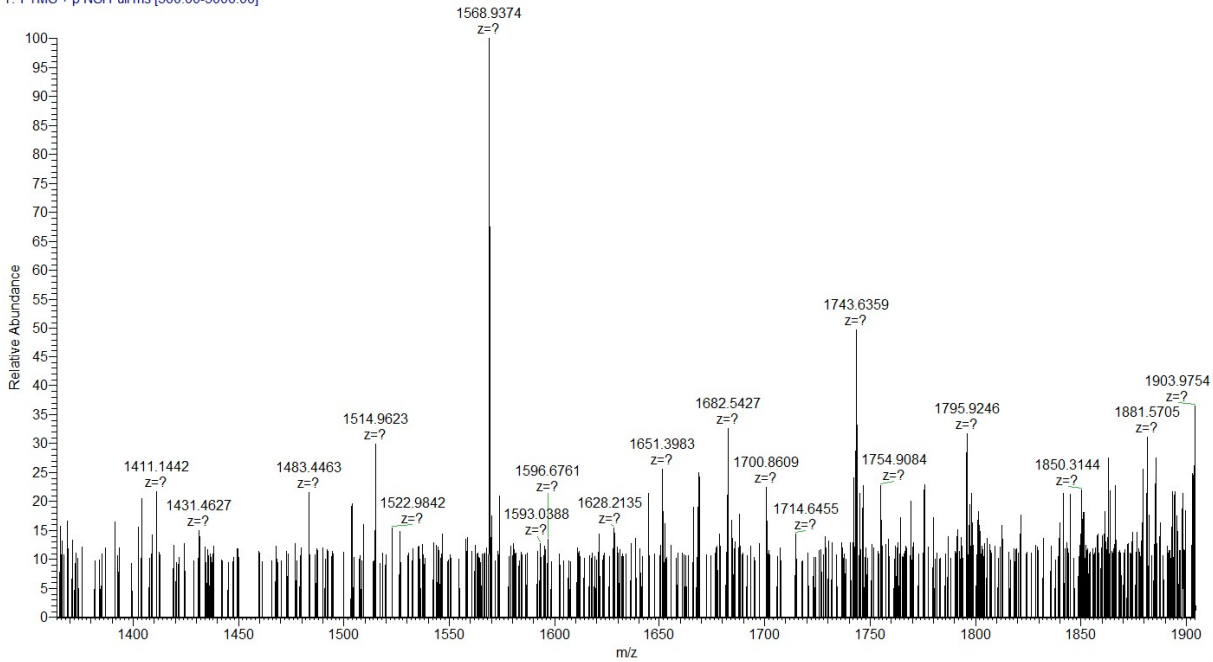

D)

OB12002 #4154-4429 RT: 56.05-60.16 AV: 265 NL: 1.55E3  
T: FTMS + p NSI Full ms [300.00-3000.00]

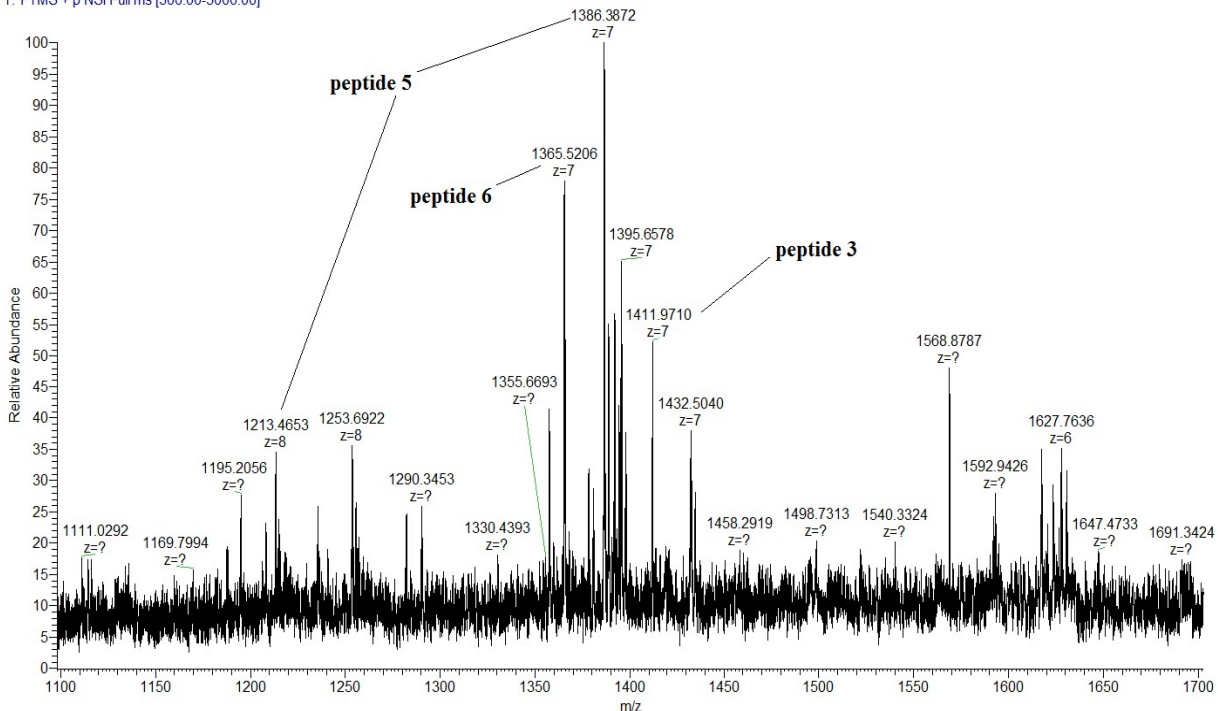

**Figure S6.** ESI-MS spectra of CAA peptides released during 3 h of endolysosomal processing. ESI-MS spectra at retention time (A) 39.91-50.75, (B) 39.91-50.75 zoom out, (C) 41.64-42.33 and (D) 56.05-60.16 seconds. A 3h time point in CAA sample peptide 15 is also still the most dominant, and similar to Art v 1 sample peptide 16 appears. Dominant isoforms of intact CAA are no longer seen and peptides 3, 5 and 6 are still present.

A)

OB1198 #2396.4032 RT: 39.78-52.06 AV: 586 NL: 1.14E5  
T: FTMS + p NSI Full ms [300.00-3000.00]

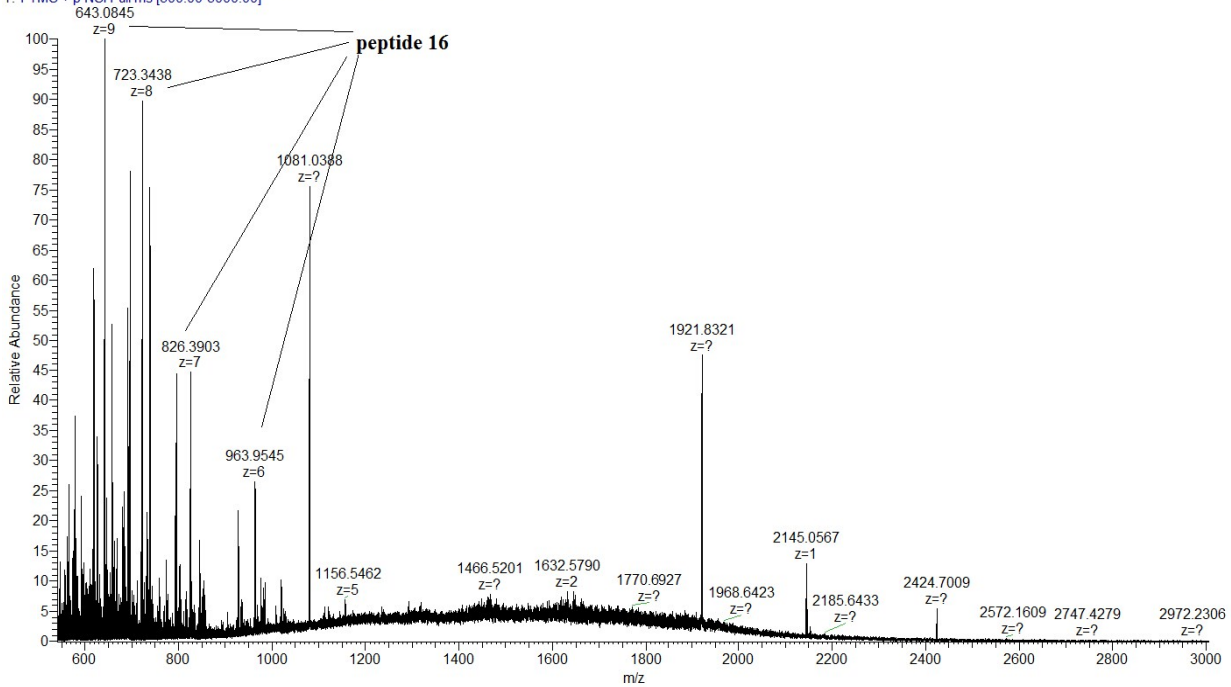

B)

OB1198 #2396.4032 RT: 39.78-52.06 AV: 586 NL: 1.14E5  
T: FTMS + p NSI Full ms [300.00-3000.00]

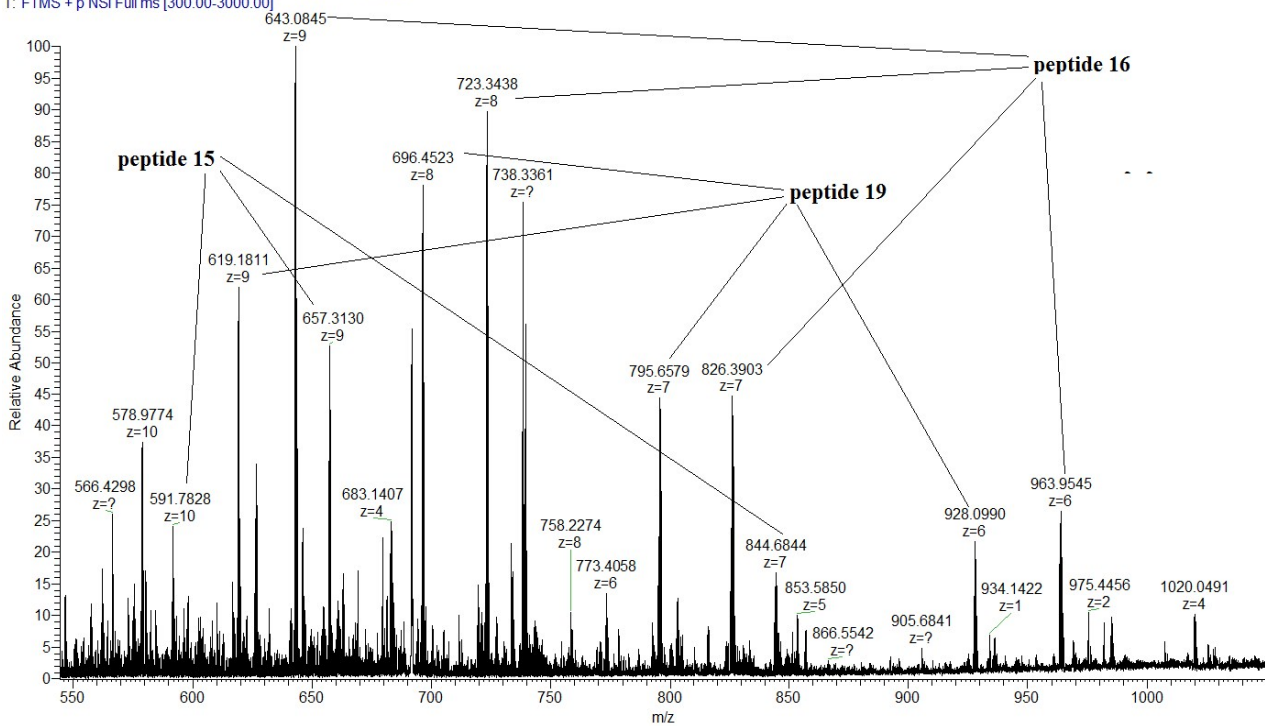

C)

OB1198 #2715-2759 RT: 42.73-43.00 AV: 8 NL: 1.12E4  
T: FTMS + p NSI Full ms [300.00-3000.00]

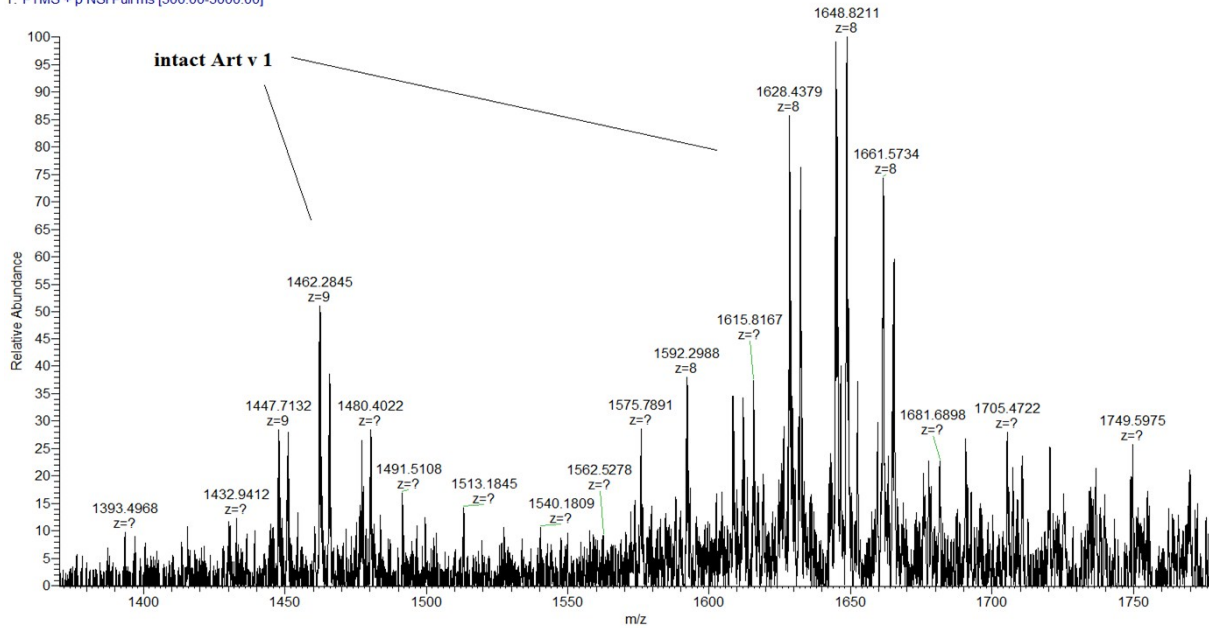

D)

OB1198 #4299-4583 RT: 55.80-60.10 AV: 274 NL: 3.63E3  
T: FTMS + p NSI Full ms [300.00-3000.00]

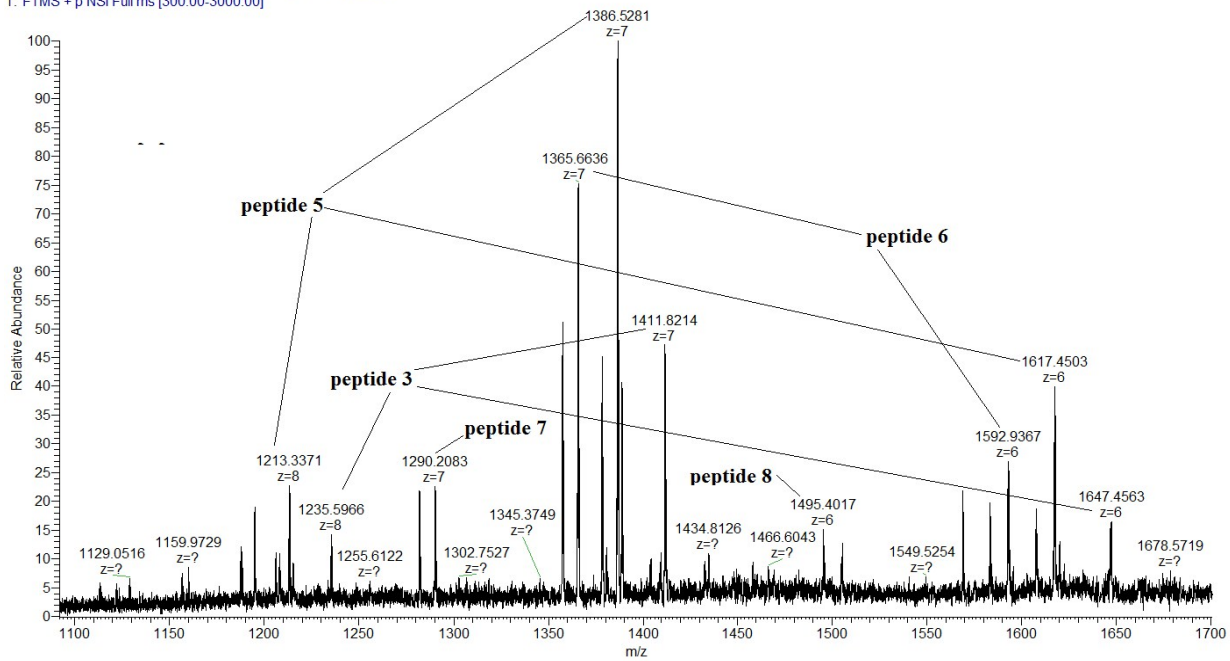

**Figure S7.** ESI-MS spectra of Art v 1 peptides released during 12 h of endolysosomal processing. ESI-MS spectra at retention time (A) 39.78-52.06, (B) 39.78-52.06 zoom out, (C) 42.73-43.00 and (D) 55.80-60.10 seconds. After 12h of degradation of Art v 1 peptide 15 is less abundant, and the most dominant peptide is 16, but there is also appearance of highly abundant peptide peptide 19 (5566 Da). Peptide 19 is peptide 16 shortened again by N-terminal dipeptide Ser-Lys, and it actually consists of whole defensin domain shortened by N-terminal Lys and C-terminal Cys. Dominant isoforms of intact Art v 1 are still present, as well as peptides 3,5,6,7 and 8.

A)

OB1203 #2426-4027 RT: 39.84-52.00 AV: 577 NL: 9.62E4  
T: FTMS + p NSI Full ms [300.00-3000.00]

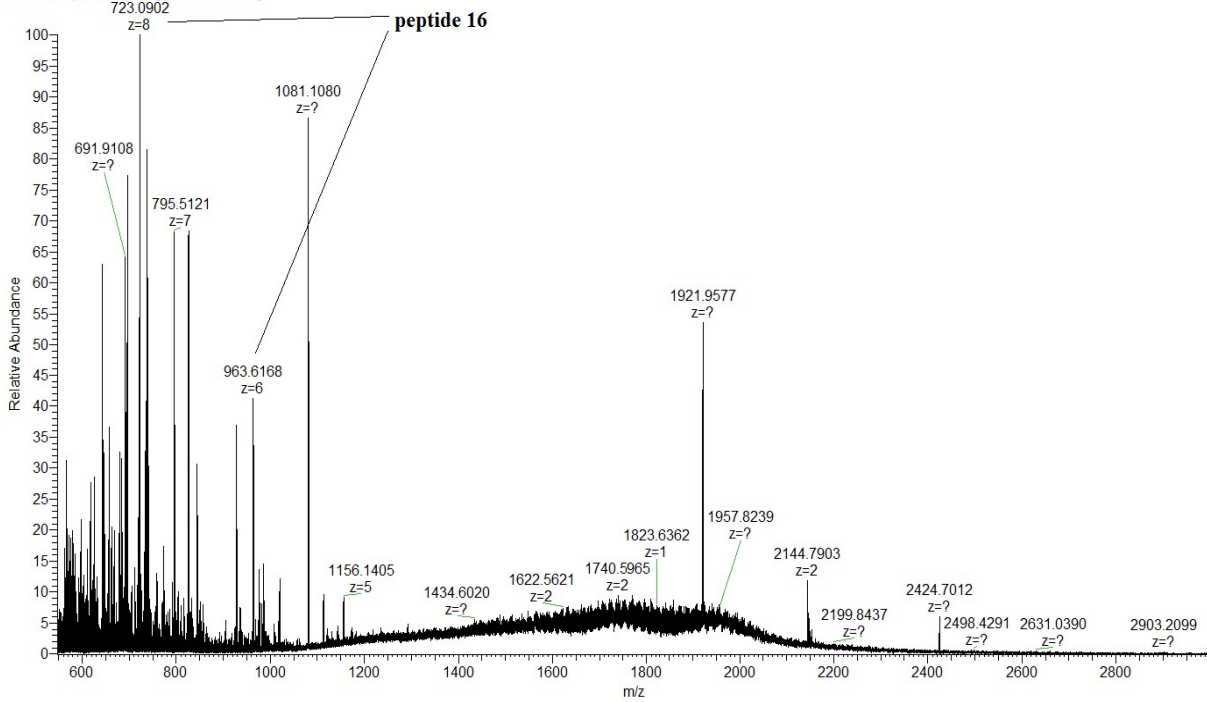

B)

OB1203 #2426-4027 RT: 39.84-52.00 AV: 577 NL: 9.62E4  
T: FTMS + p NSI Full ms [300.00-3000.00]

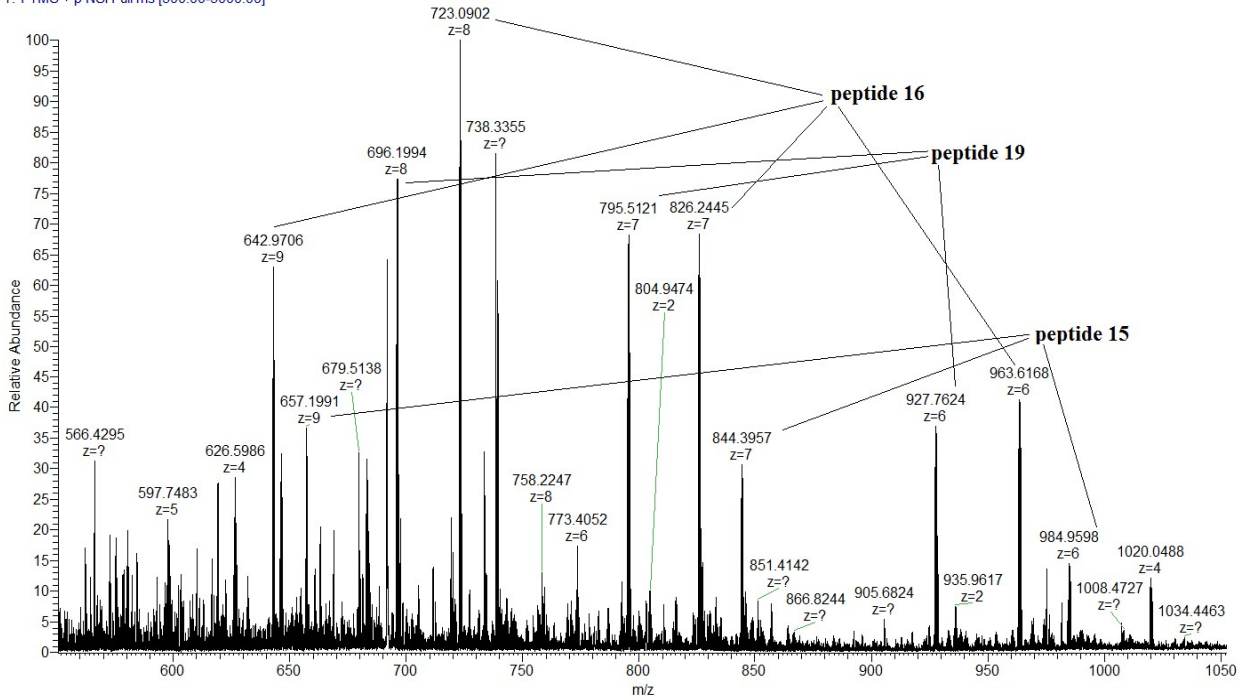

C)

OB1203 #2599-2689 RT: 41.46-42.15 AV: 23 NL: 1.52E4  
T: FTMS + p NSI Full ms [300.00-3000.00]

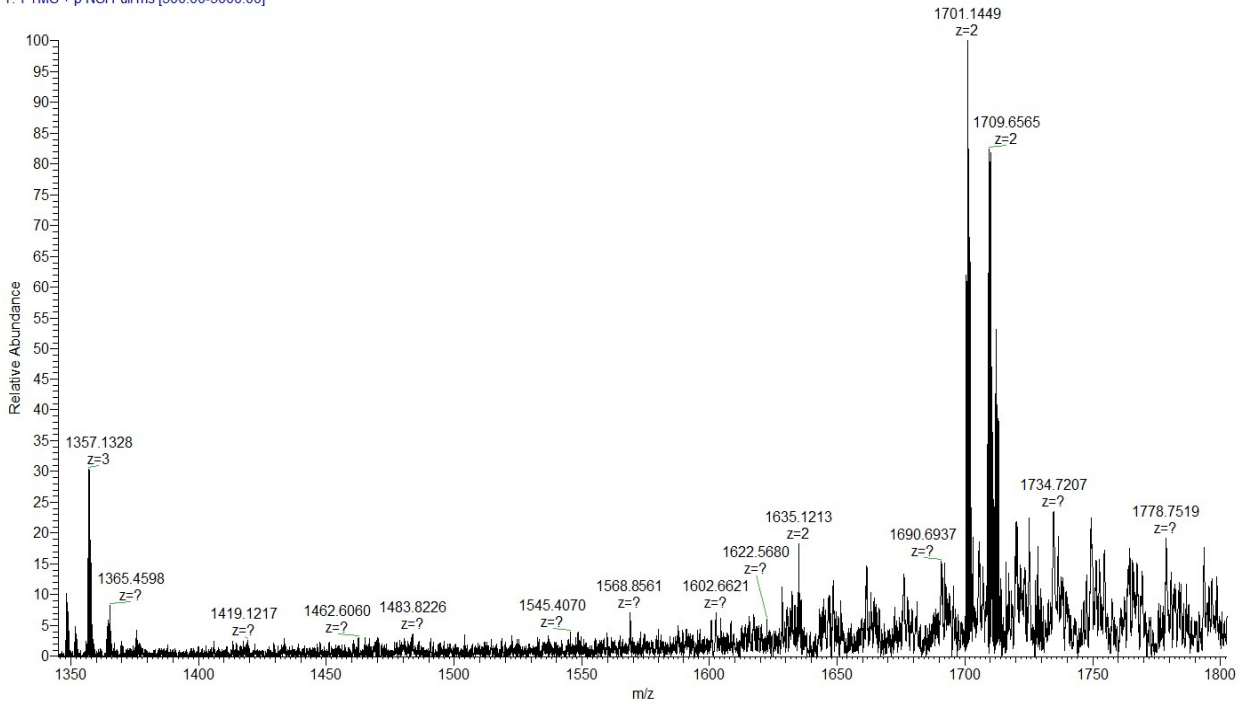

D)

OB1203 #4292-4563 RT: 55.81-59.97 AV: 267 NL: 1.98E3  
T: FTMS + p NSI Full ms [300.00-3000.00]

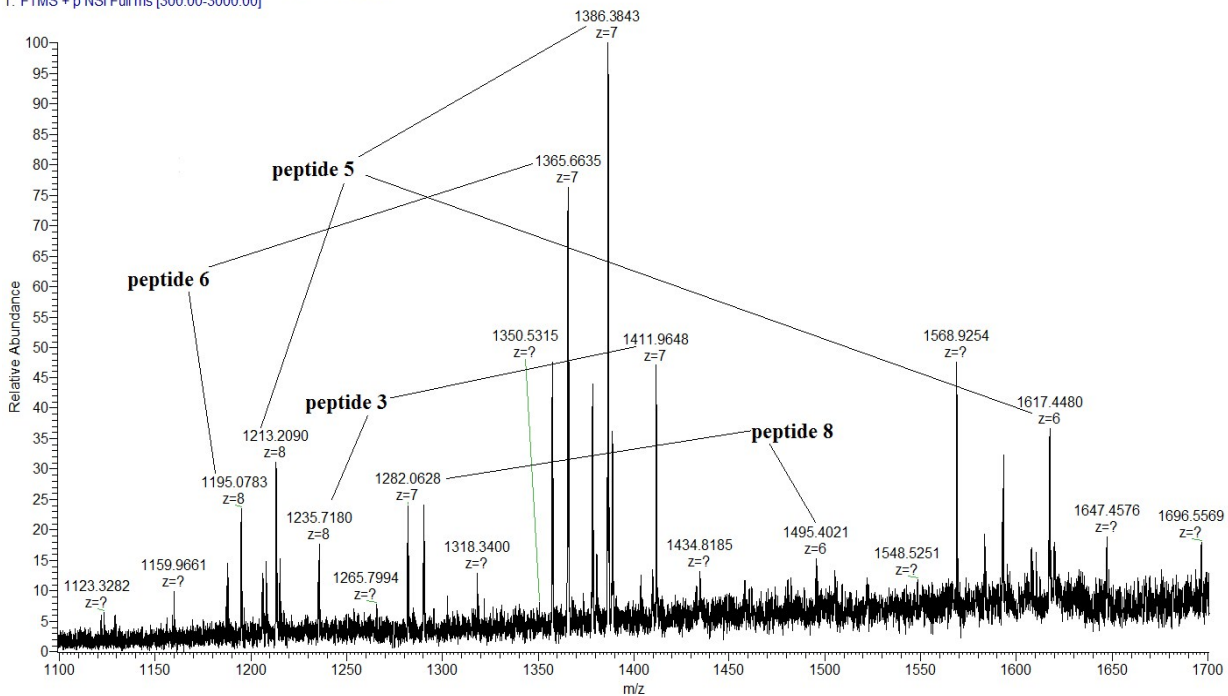

**Figure S8.** ESI-MS spectra of CAA peptides released during 12 h of endolysosomal processing. ESI-MS spectra at retention time (A) 39.84-52.00, (B) 39.84-52.00 zoom out, (C) 41.46-42.15 and (D) 55.81-59.97 seconds. Similarly to Art v1 sample, at 12 h time point in CAA sample peptide 16 is the most dominant, with remained peptide 15 and appearance of peptide 19. In addition to peptides 3, 5 and 6, shorted peptide 8 appear.



A)

OB1199 #2340-3935 RT: 39.77-52.25 AV: 591 NL: 1.59E5  
T: FTMS + p NSI Full ms [300.00-3000.00]

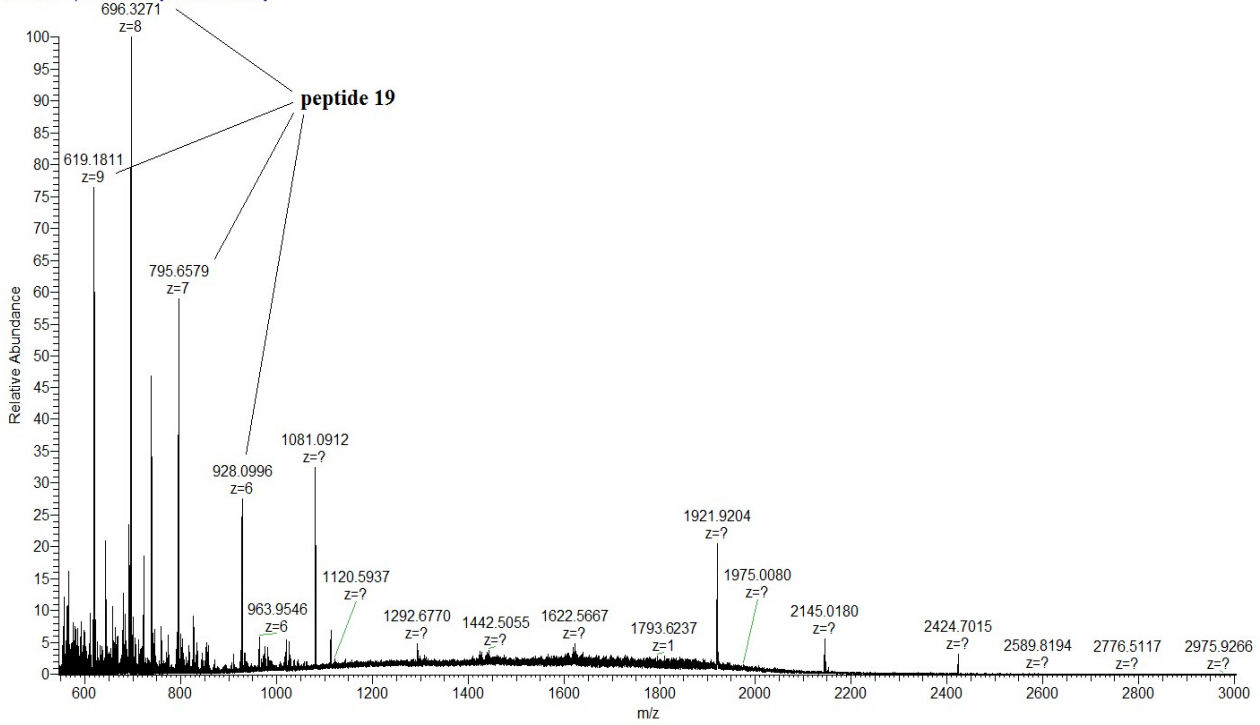

B)

OB1199 #2340-3935 RT: 39.77-52.25 AV: 591 NL: 1.59E5  
T: FTMS + p NSI Full ms [300.00-3000.00]

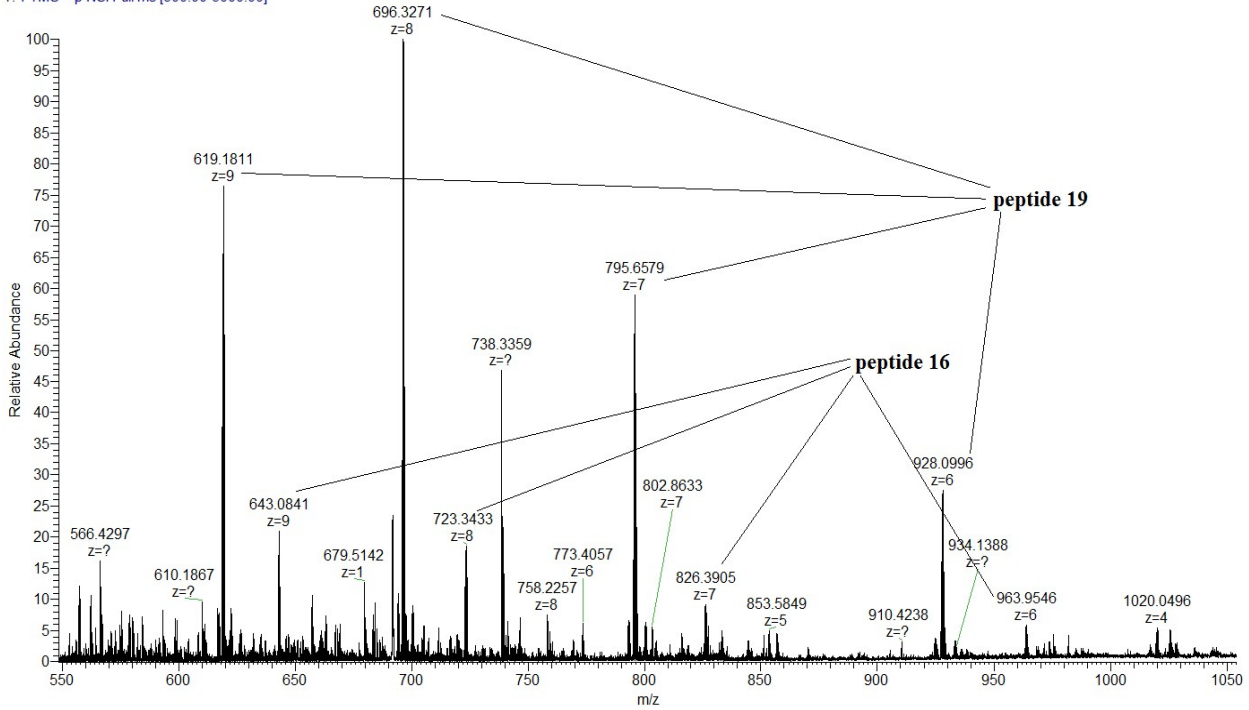

C)

OB1199 #2652-2740 RT: 42.78-43.44 AV: 24 NL: 1.40E3  
T: FTMS + p NSI Full ms [300.00-3000.00]

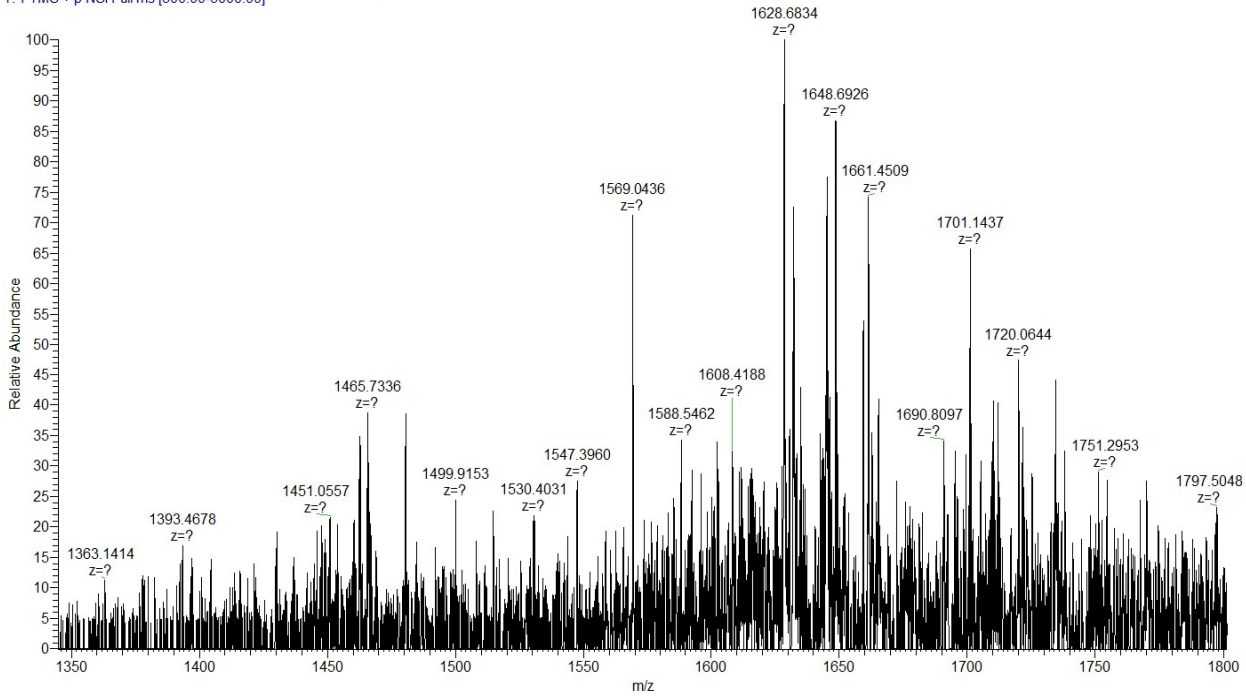

D)

OB1199 #4192-4465 RT: 55.98-60.16 AV: 271 NL: 2.41E3  
T: FTMS + p NSI Full ms [300.00-3000.00]

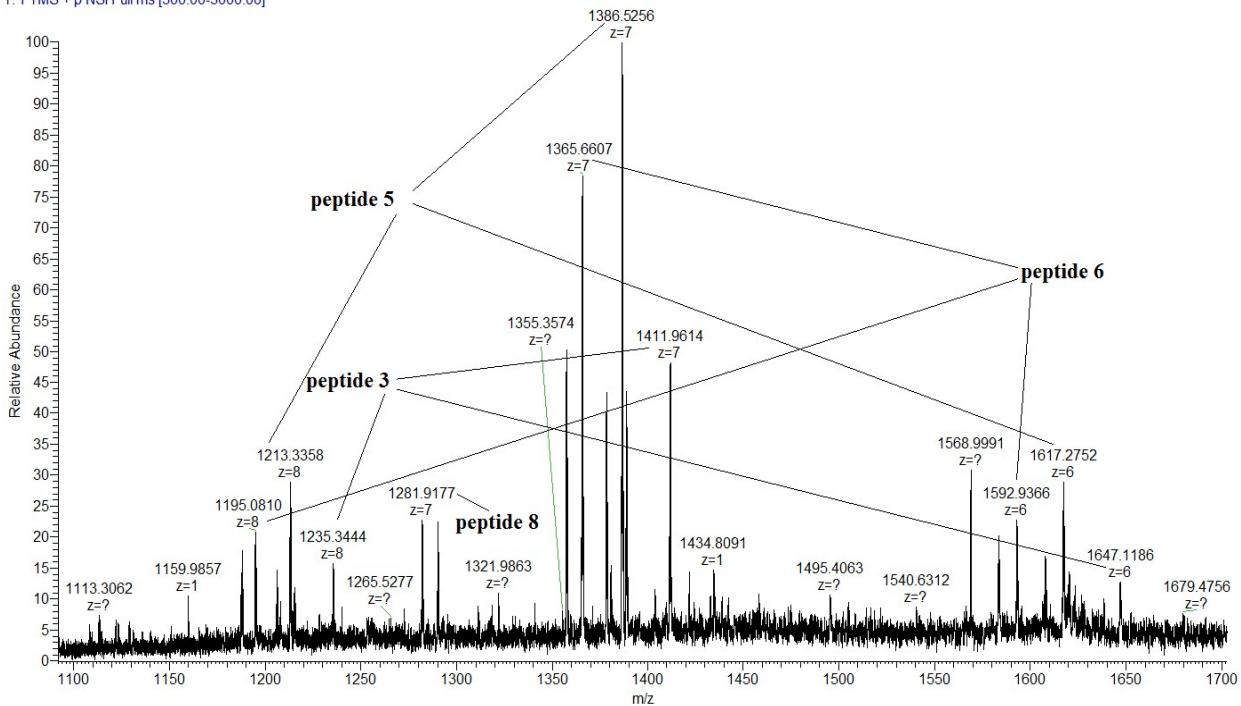

**Figure S9.** ESI-MS spectra of Art v 1 peptides released during 24 h of endolysosomal processing. ESI-MS spectra at retention time (A) 39.77-52.25, (B) 39.77-52.25 zoom out, (C) 42.78-43.44 and (D) 55.98-60.16 seconds. After 24 h peptide 19 predominates and peptide 15 completely disappears, while peptide 16 is still present in Art v 1 sample. Peptides 3, 5, 6 and 8 can still be detected.

A)

OB1208 #2576-4293 RT: 39.78-52.00 AV: 487 NL: 7.62E4  
T: FTMS + p NSI Full ms [300.00-3000.00]

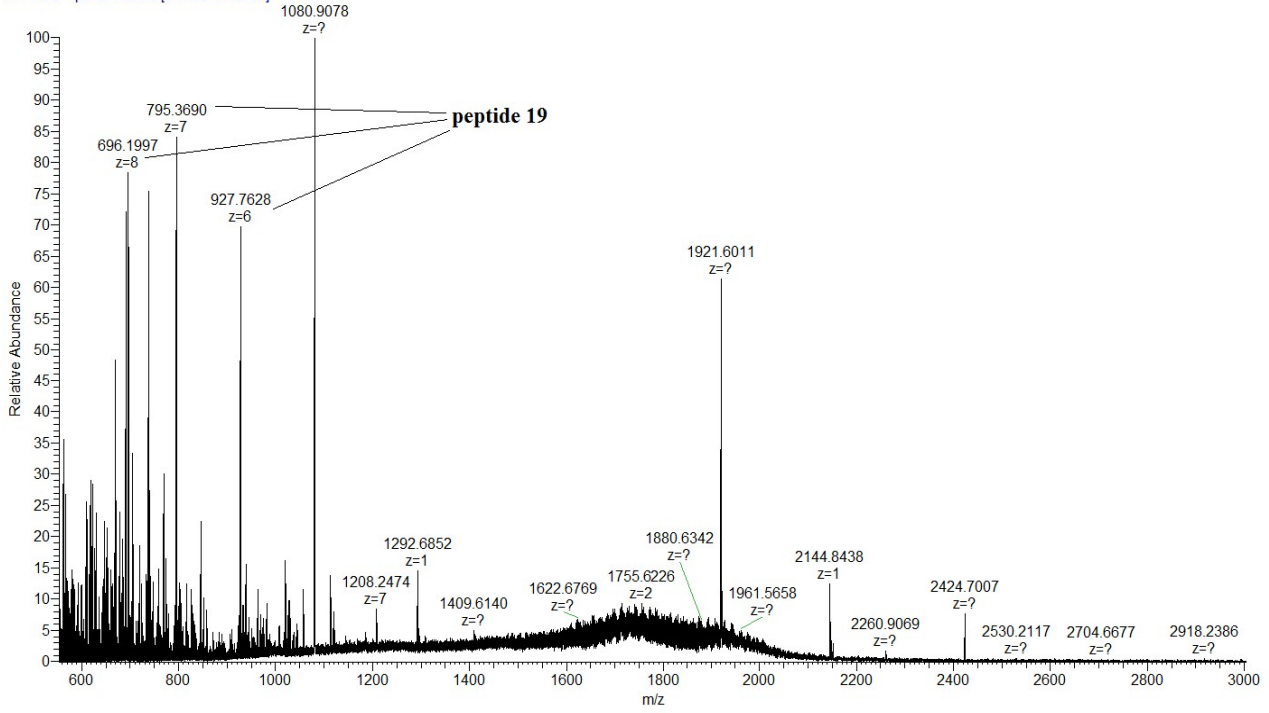

B)

OB1208 #2576-4293 RT: 39.78-52.00 AV: 487 NL: 6.41E4  
T: FTMS + p NSI Full ms [300.00-3000.00]

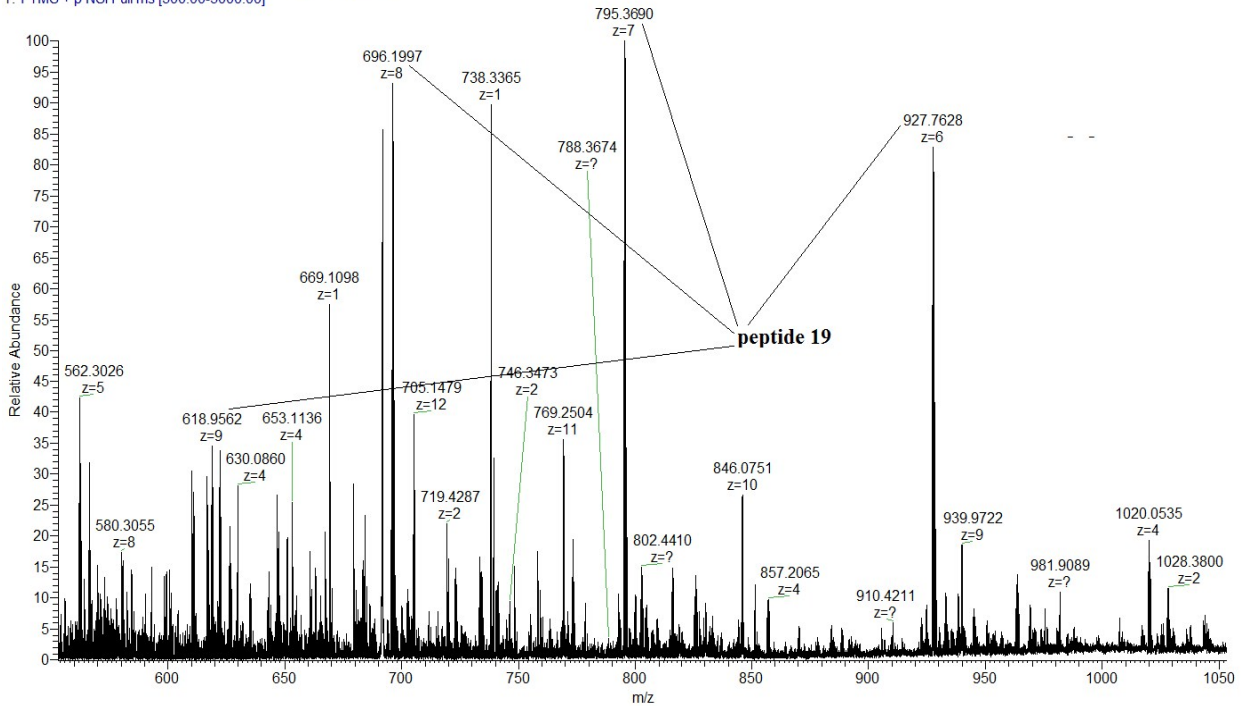

C)

OB1208 #2770.2884 RT: 41.58-42.52 AV: 41 NL: 8.49E2  
T: FTMS + p NSI Full ms [300.00-3000.00]

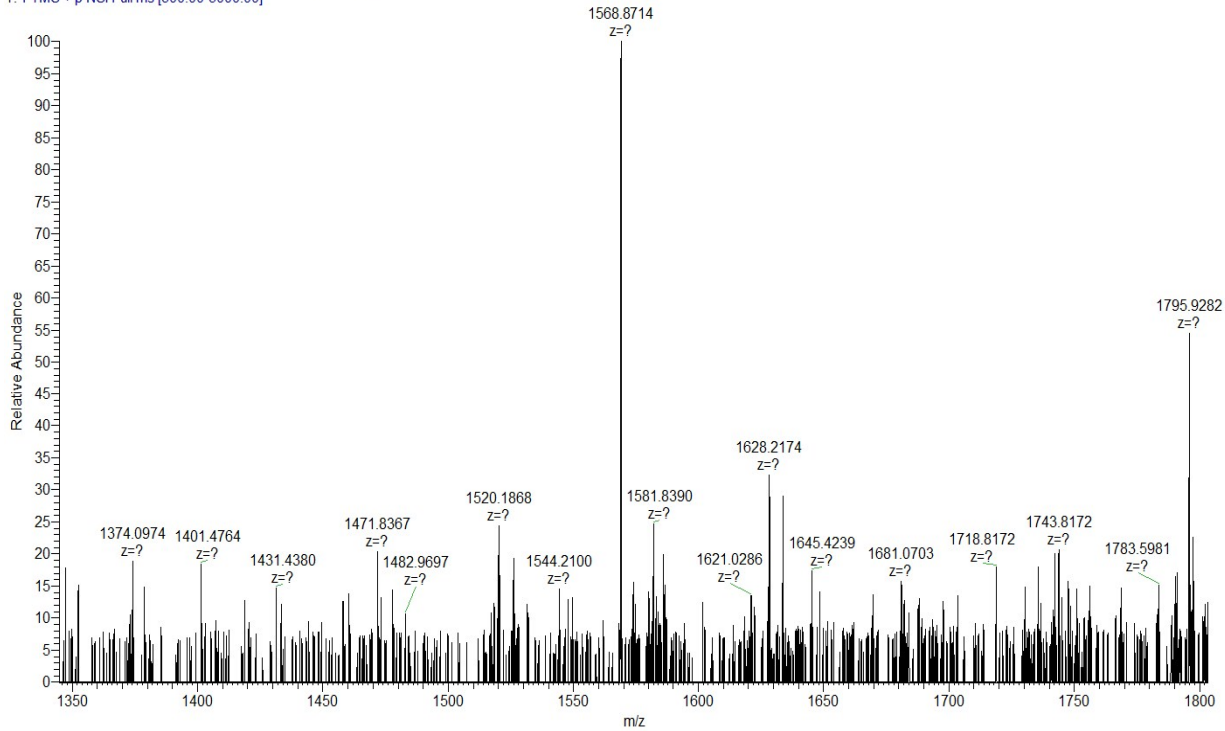

D)

OB1208 #4570.4846 RT: 55.93-60.16 AV: 272 NL: 9.37E2  
T: FTMS + p NSI Full ms [300.00-3000.00]

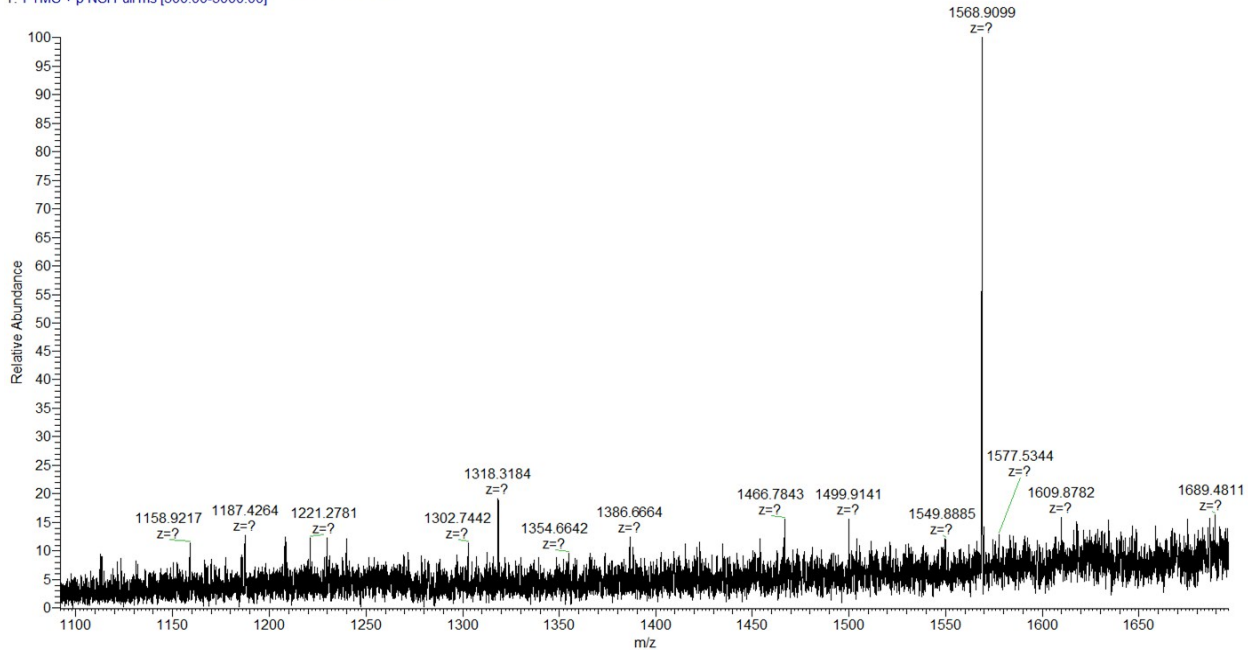

**Figure S10.** ESI-MS spectra of CAA peptides released during 24 h of endolysosomal processing. ESI-MS spectra at retention time (A) 39.78-52.00, (B) 39.78-52.00 zoom out, (C) 41.58-42.52 and (D) 55.93-60.16 seconds. In CAA sample after 24 h peptide 19 also predominates and peptide 15 completely disappear. Peptides 3, 5, 6 and 8 disappear.

A)

OB1221 #2510-3755 RT: 39.84-51.87 AV: 645 NL: 2.59E4  
T: FTMS + p NSI Full ms [300.00-3000.00]

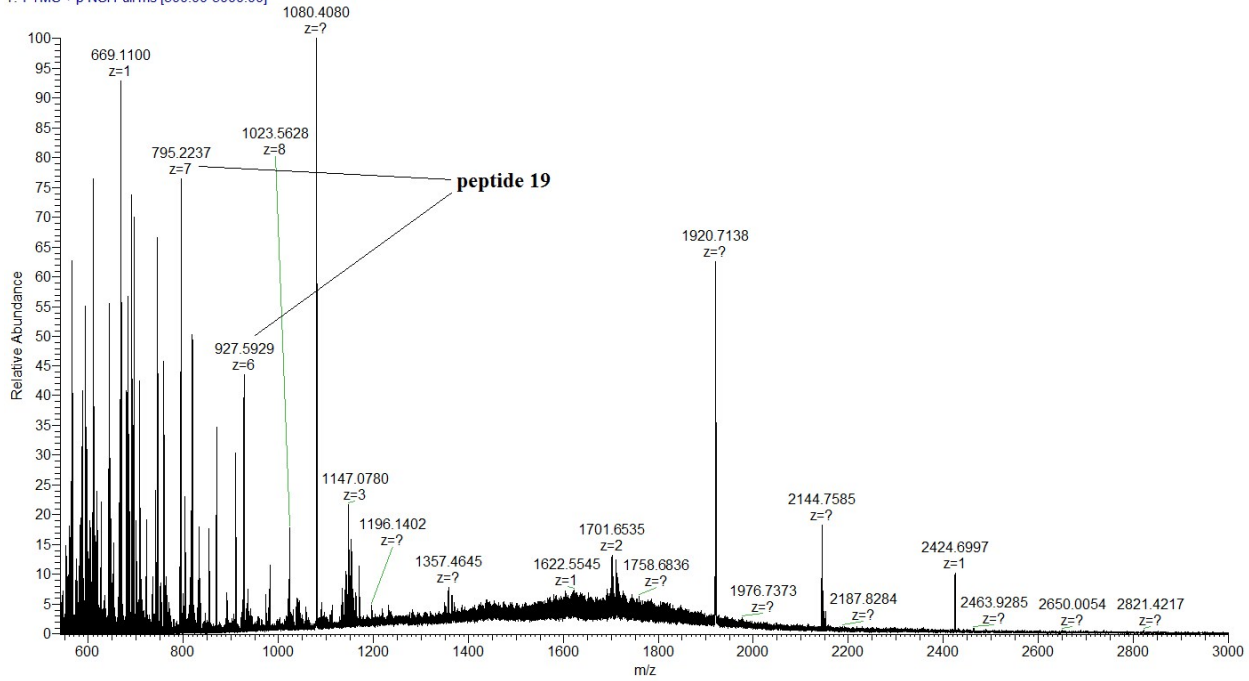

B)

OB1221 #2510-3755 RT: 39.84-51.87 AV: 645 NL: 2.41E4  
T: FTMS + p NSI Full ms [300.00-3000.00]

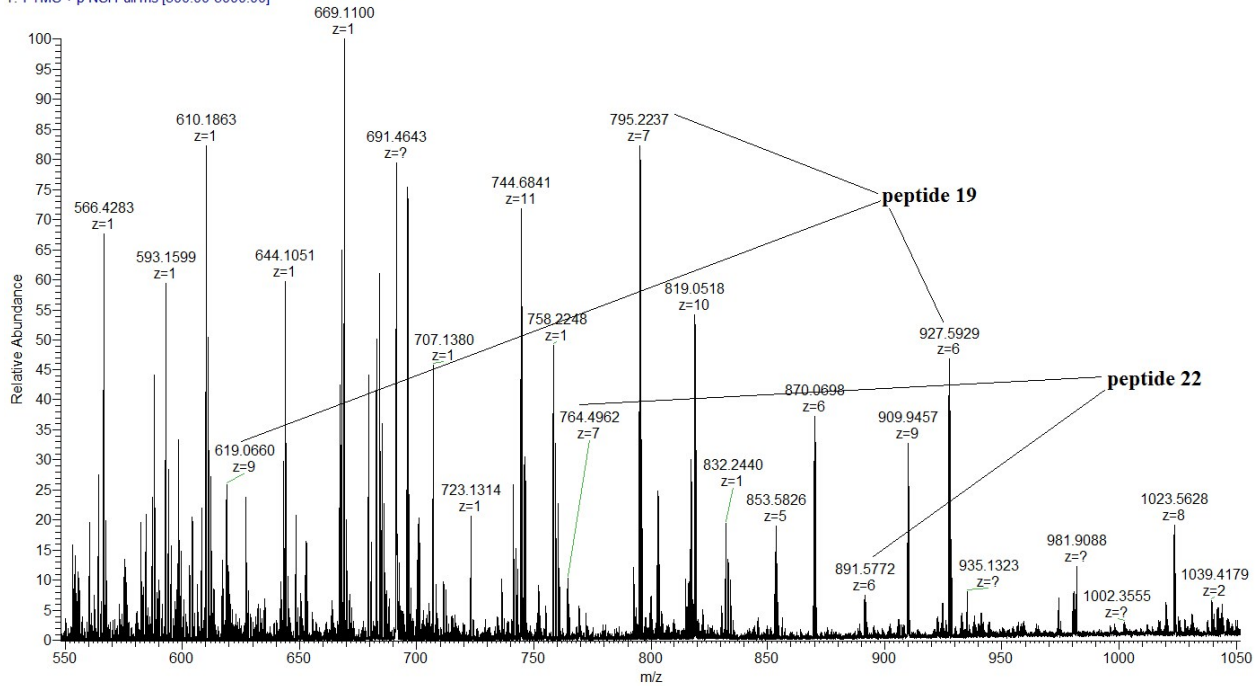

C)

OB1221 #2699-2779 RT: 41.90-42.70 AV: 49 NL: 4.54E3  
T: FTMS + p NSI Full ms [300.00-3000.00]

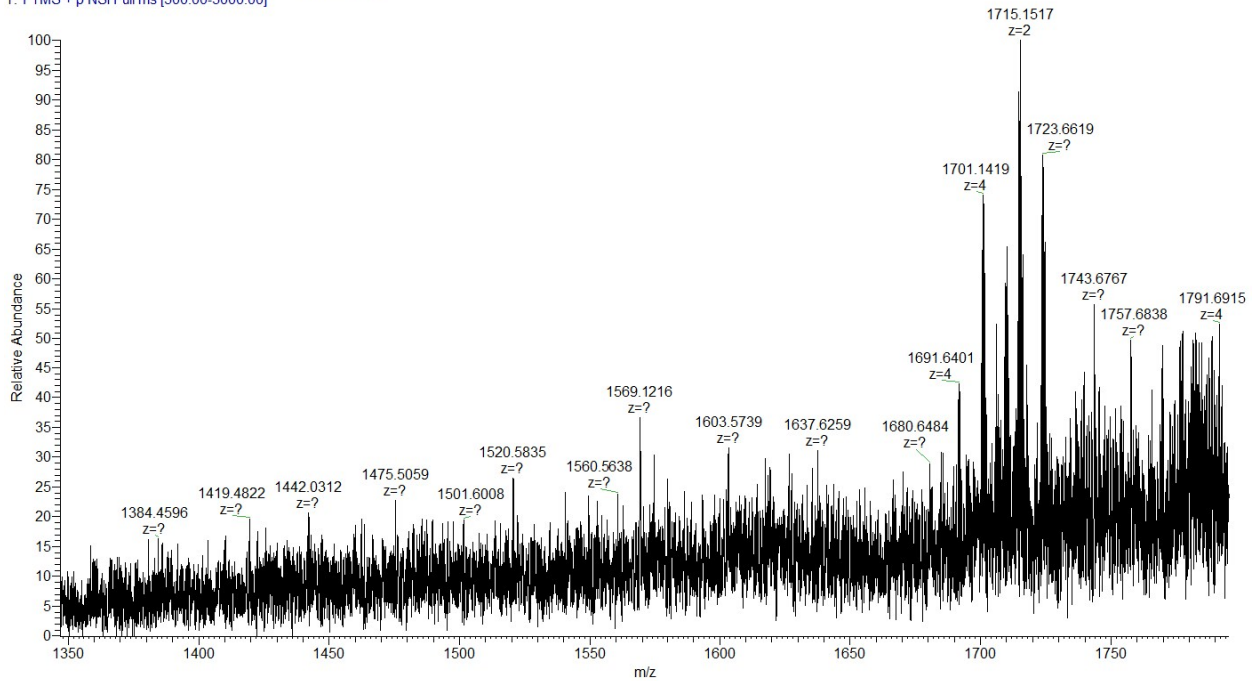

D)

OB1221 #4026-4297 RT: 55.99-60.11 AV: 268 NL: 7.51E2  
T: FTMS + p NSI Full ms [300.00-3000.00]

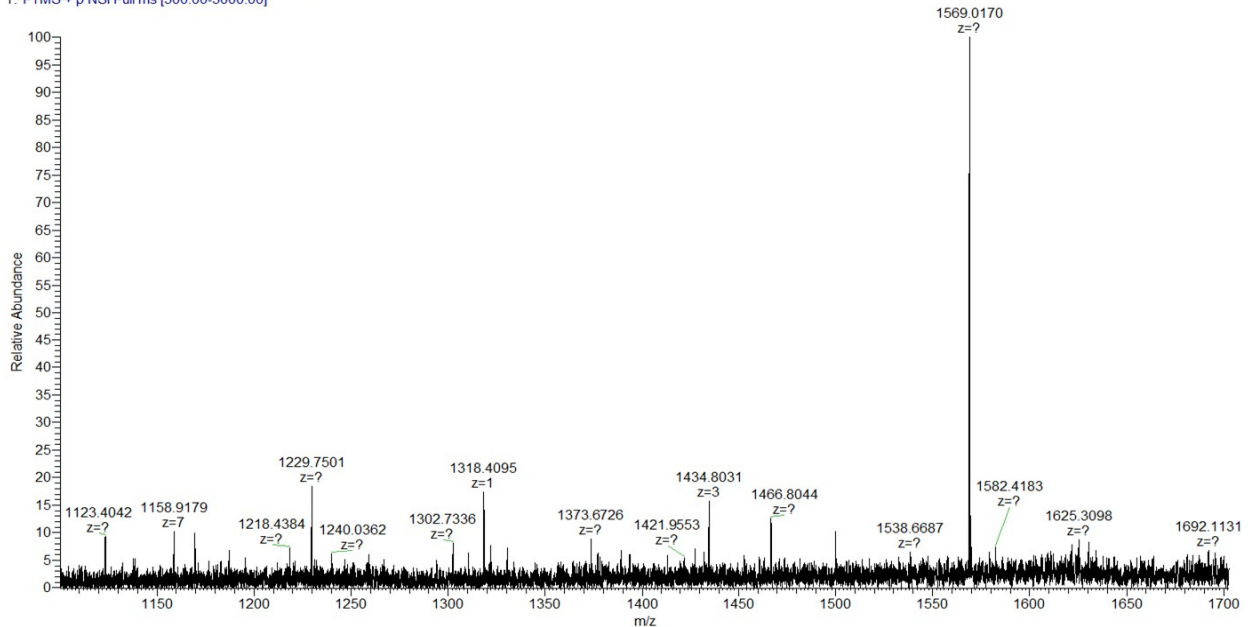

**Figure S11.** ESI-MS spectra of Art v 1 peptides released during 48 h of endolysosomal processing. ESI-MS spectra at retention time (A) 39.84-51.87, (B) 39.84-51.87 zoom out, (C) 41.90-42.70 and (D) 55.99-60.11 seconds. After 48 h peptide 19 is still the most abundant peptide, and peptide 22 appears (5344 Da). Peptide 22 is peptide 19 shortened by N-terminal dipeptide Leu-Cys. This suggests that even after 48 h of digestion defensin domain is still resistant to degradation due to its compact structure. Peptides 3, 5, 6 and 8 disappear.

A)

OB1209 #2571-4196 RT: 39.84-52.00 AV: 579 NL: 1.03E5  
T: FTMS + p NSI Full ms [300.00-3000.00]

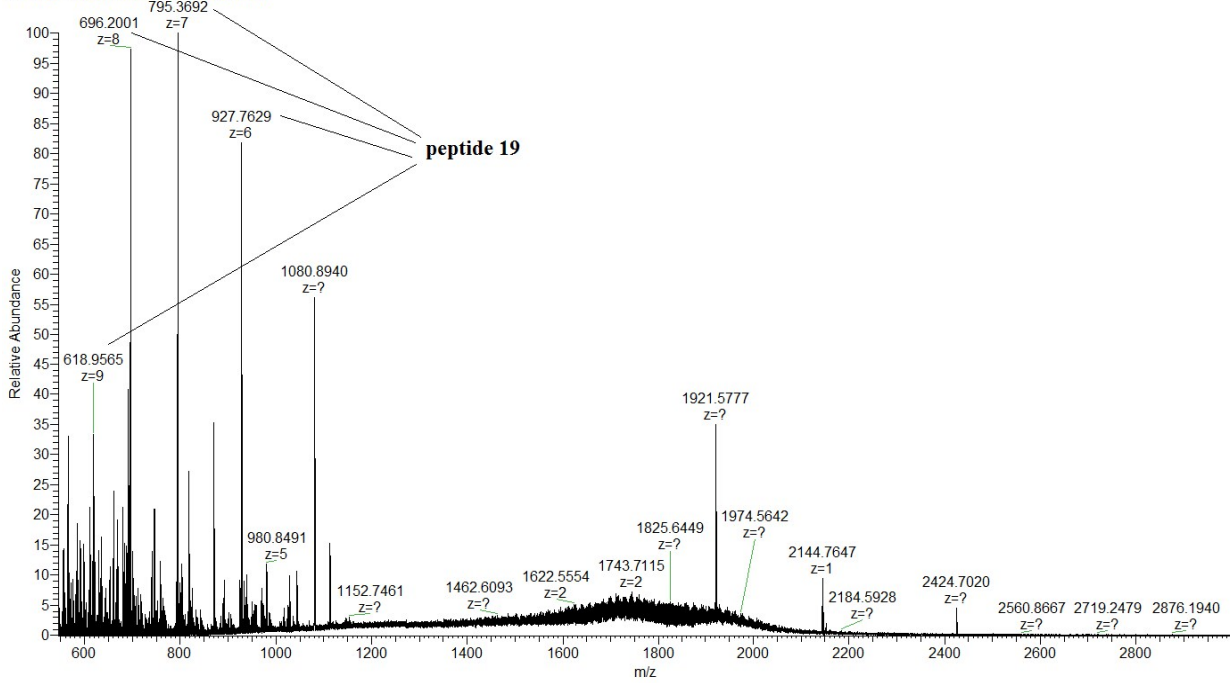

B)

OB1209 #2571-4196 RT: 39.84-52.00 AV: 579 NL: 1.03E5  
T: FTMS + p NSI Full ms [300.00-3000.00]

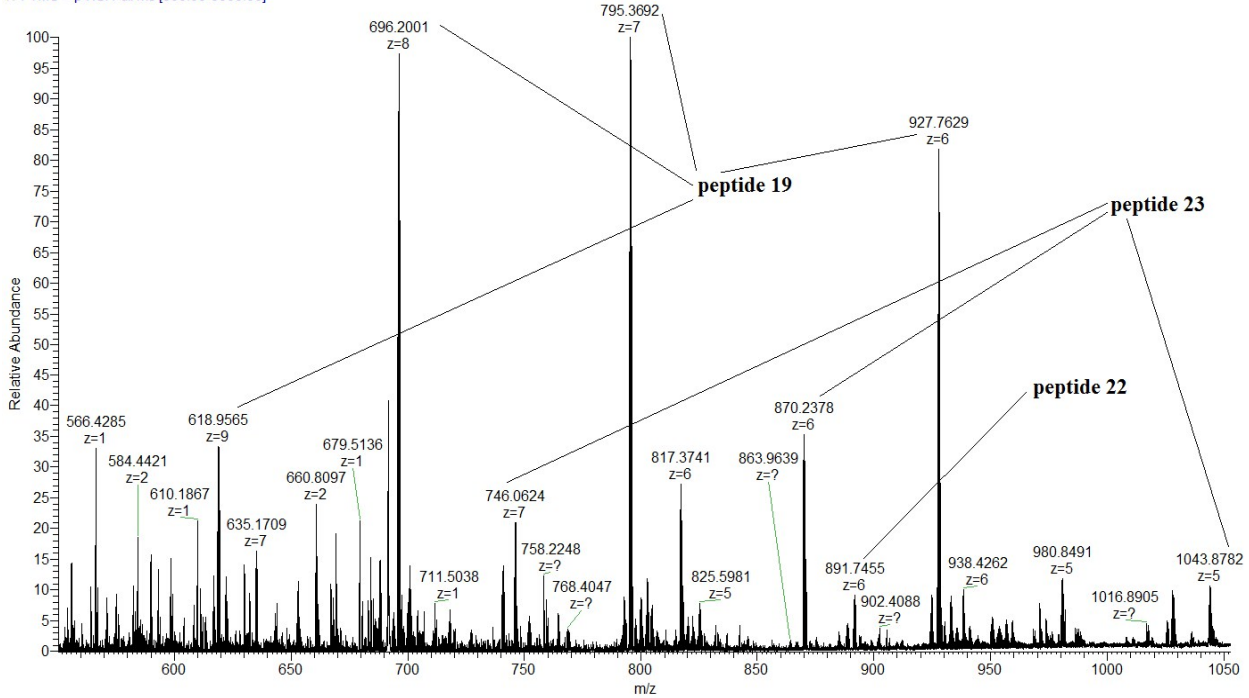

C)

OB1209 #2800-2887 RT: 41.85-42.51 AV: 26 NL: 6.36E2  
T: FTMS + p NSI Full ms [300.00-3000.00]

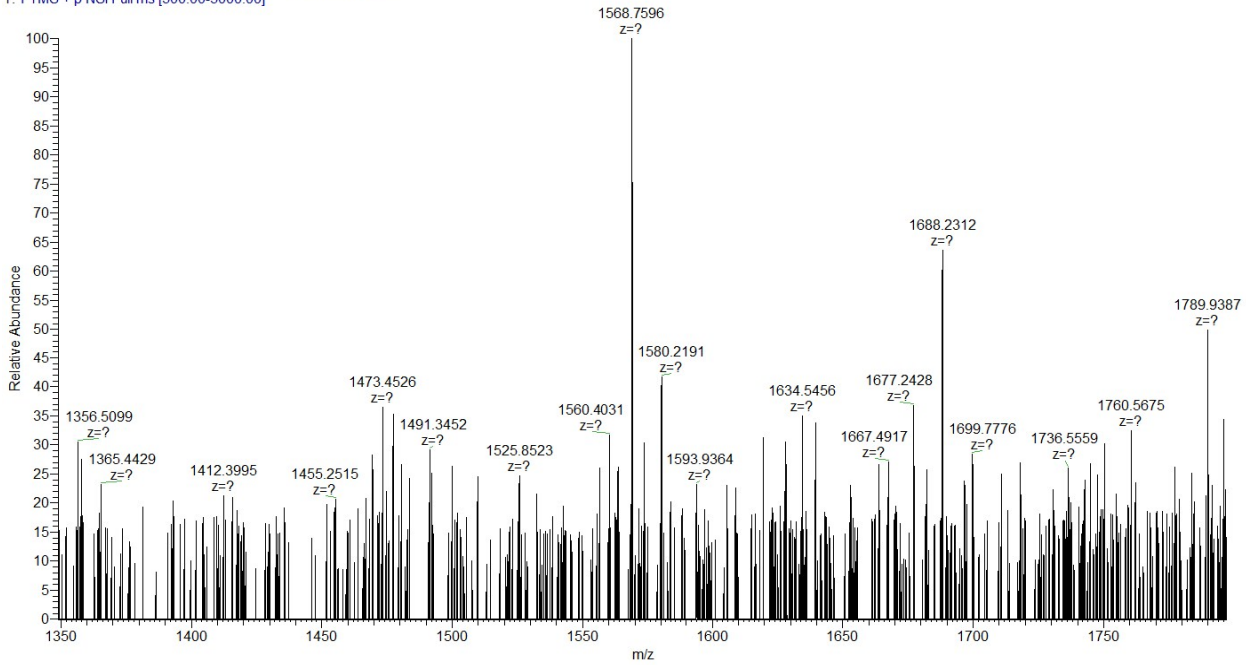

D)

OB1209 #4473-4734 RT: 55.99-59.98 AV: 255 NL: 7.44E2  
T: FTMS + p NSI Full ms [300.00-3000.00]

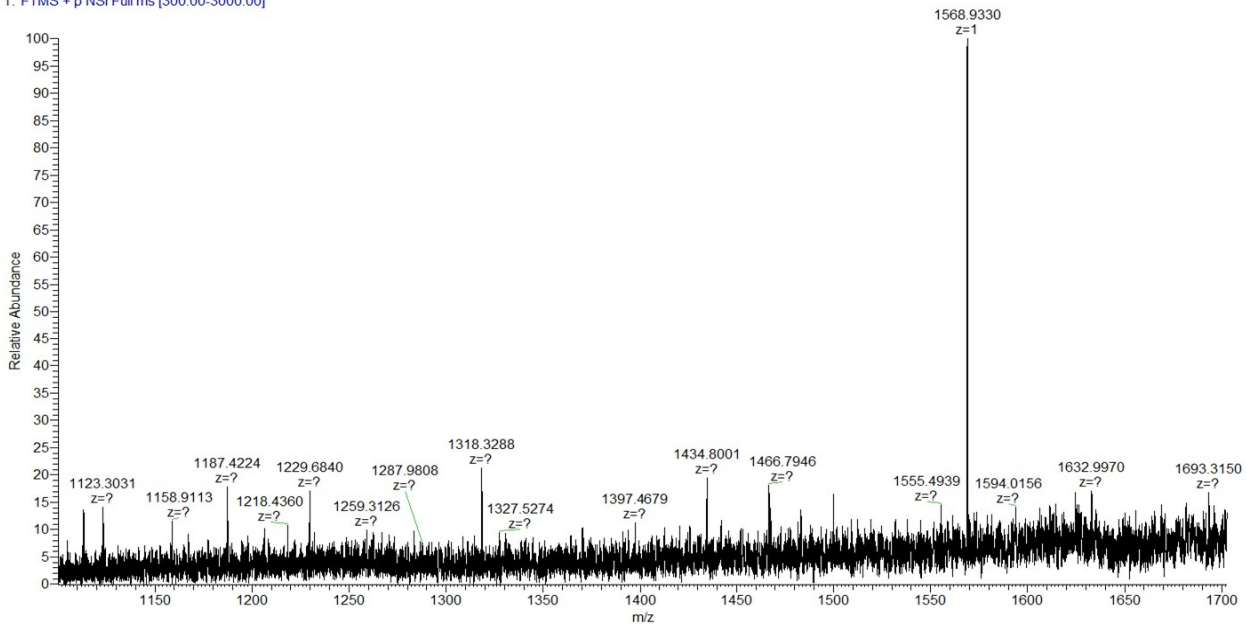

**Figure S12.** ESI-MS spectra of CAA peptides released during 48 h of endolysosomal processing. ESI-MS spectra at retention time (A) 39.84-52.00, (B) 39.84-52.00 zoom out, (C) 41.85-42.51 and (D) 55.99-59.98 seconds. Similarly to Art v 1 sample, in CAA sample after 48 h peptide 19 is also the most abundant peptide, and peptide 22 appears (5344 Da). In this sample presence of peptide 23 (5215 Da), which is peptide 22 shortened by N-terminal E, can be observed. This suggests that after 48 h defensin domen of CAA is also still resistant to degradation as those of Art v 1.



**Table S1.** Masses of intact Art v 1 and CAA isoforms. Glycan type – the type of arabinogalactosyl proposed by Himly et al.,<sup>1</sup> HP – proline hydroxylation, Gal – galactose mass, Ara – arabinose mass, SH- disulfide bond, n.d. – not defined.

| Glycan type           | Sequence mass | Modification |      |       |    |     | Sequence conflict | Calculated mass | m/z | z        | Experimental mass | $\Delta$ mass |
|-----------------------|---------------|--------------|------|-------|----|-----|-------------------|-----------------|-----|----------|-------------------|---------------|
|                       |               | HP           | Gal  | Ara   | SH |     |                   |                 |     |          |                   |               |
| <b>Intact Art v 1</b> |               |              |      |       |    |     |                   |                 |     |          |                   |               |
| n.d.                  | 10800.07      | +256         | +648 | +1848 | -8 | +93 | 13637.07          | 1516.087        | 9   | 13635.79 | 1.2843            |               |
| n.d.                  | 10800.07      | +256         | +648 | +1848 | -8 | +32 | 13576.07          | 1509.419        | 9   | 13575.77 | 0.3035            |               |
| 17                    | 10800.07      | +256         | +486 | +1848 | -8 | +32 | 13414.07          | 1491.415        | 9   | 13413.73 | 0.3395            |               |
| 17                    | 10800.07      | +256         | +486 | +1848 | -8 | +61 | 13443.07          | 1494.638        | 9   | 13442.74 | 0.328             |               |
| 17                    | 10800.07      | +256         | +486 | +1848 | -8 | +93 | 13475.07          | 1498.416        | 9   | 13476.74 | -1.6722           |               |
| 16                    | 10800.07      | +256         | +486 | +1716 | -8 | +14 | 13264.07          | 1474.742        | 9   | 13263.68 | 0.3929            |               |
| 16                    | 10800.07      | +256         | +486 | +1716 | -8 | +32 | 13282.07          | 1476.633        | 9   | 13280.7  | 1.3703            |               |
| 16                    | 10800.07      | +256         | +486 | +1716 | -8 | +61 | 13311.07          | 1479.967        | 9   | 13310.7  | 0.3697            |               |
| 16                    | 10800.07      | +256         | +486 | +1716 | -8 | +93 | 13343.07          | 1483.41         | 9   | 13341.69 | 1.3809            |               |
| 15                    | 10800.07      | +256         | +486 | +1584 | -8 | +14 | 13132.07          | 1459.071        | 9   | 13122.64 | 9.4346            |               |
| 15                    | 10800.07      | +256         | +486 | +1584 | -8 | +32 | 13150.07          | 1462.073        | 9   | 13149.66 | 0.4139            |               |
| 15                    | 10800.07      | +256         | +486 | +1584 | -8 | +61 | 13179.07          | 1465.407        | 9   | 13179.66 | -0.5903           |               |
| 13                    | 10800.07      | +256         | +324 | +1584 | -8 | +32 | 12988.07          | 1444.402        | 9   | 12990.61 | -2.5435           |               |
| 13                    | 10800.07      | +256         | +324 | +1584 | -8 | +61 | 13017.07          | 1447.403        | 9   | 13017.63 | -0.5606           |               |
| 13                    | 10800.07      | +256         | +324 | +1584 | -8 | +93 | 13049.07          | 1450.737        | 9   | 13047.63 | 1.4397            |               |
| 13                    | 10800.07      | +256         | +324 | +1584 | -8 | +14 | 12970.07          | 1442.168        | 9   | 12970.51 | -0.4447           |               |
| 11                    | 10800.07      | +256         | +324 | +1452 | -8 | +14 | 12838.07          | 1427.725        | 9   | 12840.53 | -2.4586           |               |
| 11                    | 10800.07      | +256         | +324 | +1452 | -8 | +32 | 12856.07          | 1429.729        | 9   | 12858.56 | -2.4874           |               |
| 11                    | 10800.07      | +256         | +324 | +1452 | -8 | +61 | 12885.07          | 1432.732        | 9   | 12885.59 | -0.5216           |               |
| 9                     | 10800.07      | +256         | +324 | +1320 | -8 | +32 | 12724.07          | 1415.056        | 9   | 12726.51 | -2.4358           |               |
| 9                     | 10800.07      | +256         | +324 | +1320 | -8 | +61 | 12753.07          | 1418.053        | 9   | 12753.47 | -0.4034           |               |
| 7                     | 10800.07      | +256         | +324 | +1188 | -8 | +32 | 12592.07          | 1400.385        | 9   | 12594.47 | -2.3977           |               |
| <b>Intact CAA</b>     |               |              |      |       |    |     |                   |                 |     |          |                   |               |
| n.d.                  | 10800.07      | +256         | +648 | +1848 | -8 | +61 | 13605.07          | 1512.406        | 9   | 13602.65 | 2.4196            |               |
| n.d.                  | 10800.07      | +256         | +648 | +1848 | -8 | +93 | 13637.07          | 1515.972        | 9   | 13634.75 | 2.3238            |               |
| 17                    | 10800.07      | +256         | +486 | +1848 | -8 | +61 | 13443.07          | 1494.849        | 9   | 13444.64 | -1.5719           |               |
| 17                    | 10800.07      | +256         | +486 | +1848 | -8 | +93 | 13475.07          | 1497.737        | 9   | 13470.63 | 4.4352            |               |
| 16                    | 10800.07      | +256         | +486 | +1716 | -8 | +14 | 13264.07          | 1474.717        | 9   | 13263.45 | 0.6161            |               |
| 16                    | 10800.07      | +256         | +486 | +1716 | -8 | +32 | 13282.07          | 1476.623        | 9   | 13280.6  | 1.4666            |               |
| 16                    | 10800.07      | +256         | +486 | +1716 | -8 | +61 | 13311.07          | 1479.843        | 9   | 13309.59 | 1.4848            |               |
| 16                    | 10800.07      | +256         | +486 | +1716 | -8 | +93 | 13343.07          | 1483.398        | 9   | 13341.58 | 1.4898            |               |

|    |          |      |      |       |    |     |          |          |   |          |         |
|----|----------|------|------|-------|----|-----|----------|----------|---|----------|---------|
| 15 | 10800.07 | +256 | +486 | +1584 | -8 | +32 | 13150.07 | 1462.173 | 9 | 13150.56 | -0.4861 |
| 15 | 10800.07 | +256 | +486 | +1584 | -8 | +61 | 13179.07 | 1465.284 | 9 | 13178.55 | 0.5167  |
| 15 | 10801.07 | +256 | +486 | +1584 | -8 | +93 | 13212.07 | 1468.612 | 9 | 13208.51 | 3.5602  |
| 13 | 10800.07 | +256 | +324 | +1584 | -8 | +32 | 12988.07 | 1444.277 | 9 | 12989.49 | -1.423  |
| 13 | 10800.07 | +256 | +324 | +1584 | -8 | +61 | 13017.07 | 1447.39  | 9 | 13017.51 | -0.4391 |
| 13 | 10800.07 | +256 | +324 | +1584 | -8 | +93 | 13049.07 | 1450.83  | 9 | 13048.47 | 0.6045  |
| 11 | 10800.07 | +256 | +324 | +1452 | -8 | +14 | 12838.07 | 1427.725 | 9 | 12840.53 | -2.4586 |
| 11 | 10800.07 | +256 | +324 | +1452 | -8 | +32 | 12856.07 | 1429.729 | 9 | 12858.56 | -2.4874 |
| 11 | 10800.07 | +256 | +324 | +1452 | -8 | +61 | 12885.07 | 1432.732 | 9 | 12885.59 | -0.5216 |
| 9  | 10800.07 | +256 | +324 | +1320 | -8 | +32 | 12724.07 | 1414.935 | 9 | 12725.41 | -1.3441 |

**Table S2.** Masses of identified peptides released during 15 min, 3, 12, 24 and 48 h of endolysosomal processing of Art v 1 and CAA. Peptide name – number assigned to identified peptide, HP – proline hydroxylation, Gal – galactose mass, Ara – arabinose mass, SH- disulfide bond, H2O – internal peptide bond hydrolysis.

| Peptide name          | Sequence mass | Modification |      |       |    |                   |                  | Calculated mass | m/z      | z  | Experimental mass | $\Delta$ mass |
|-----------------------|---------------|--------------|------|-------|----|-------------------|------------------|-----------------|----------|----|-------------------|---------------|
|                       |               | HP           | Gal  | Ara   | SH | Sequence conflict | H <sub>2</sub> O |                 |          |    |                   |               |
| <b>Art v 1 15 min</b> |               |              |      |       |    |                   |                  |                 |          |    |                   |               |
| 1                     | 10800.07      | +256         | +324 | +1584 | -6 | +61               | 0                | 13019.07        | 1447.61  | 9  | 13019.49          | -0.4236       |
| 1                     | 10800.07      | +256         | +486 | +1584 | -8 | +32               | 0                | 13150.07        | 1462.172 | 9  | 13150.55          | -0.4771       |
| 1                     | 10800.07      | +256         | +486 | +1716 | -8 | +32               | 0                | 13282.07        | 1476.73  | 9  | 13281.57          | 0.5           |
| 1                     | 10800.07      | +256         | +486 | +1848 | -6 | +32               | 0                | 13416.07        | 1491.626 | 9  | 13415.64          | 0.4333        |
| 1                     | 10800.07      | +256         | +324 | +1320 | -6 | +32               | 0                | 12726.07        | 1591.675 | 8  | 12725.4           | 0.6732        |
| 1                     | 10800.07      | +256         | +324 | +1452 | -6 | +32               | 0                | 12858.07        | 1608.3   | 8  | 12858.4           | -0.3268       |
| 1                     | 10800.07      | +256         | +324 | +1584 | -6 | +61               | 0                | 13019.07        | 1628.309 | 8  | 13018.47          | 0.598         |
| 1                     | 10800.07      | +256         | +486 | +1584 | -8 | +32               | 0                | 13150.07        | 1644.692 | 8  | 13149.53          | 0.5372        |
| 1                     | 10800.07      | +256         | +486 | +1848 | -8 | +32               | 0                | 13414.07        | 1677.699 | 8  | 13413.59          | 0.4772        |
| 15                    | 5909.78       | 0            | 0    | 0     | 6  | 0                 | 0                | 5903.78         | 985.1316 | 6  | 5904.79           | -1.0096       |
| 15                    | 5909.78       | 0            | 0    | 0     | 4  | 0                 | 0                | 5905.78         | 844.6865 | 7  | 5905.806          | -0.0255       |
| 15                    | 5909.78       | 0            | 0    | 0     | 4  | 0                 | 0                | 5905.78         | 739.2274 | 8  | 5905.819          | -0.0392       |
| 15                    | 5909.78       | 0            | 0    | 0     | 4  | 0                 | 0                | 5905.78         | 657.3148 | 9  | 5906.833          | -1.0532       |
| 15                    | 5909.78       | 0            | 0    | 0     | 4  | 0                 | 0                | 5905.78         | 591.684  | 10 | 5906.84           | -1.06         |
| 24                    | 4966.67       | 0            | 0    | 0     | 4  | 0                 | 0                | 4962.67         | 828.0981 | 6  | 4962.589          | 0.0814        |
| 24                    | 4966.67       | 0            | 0    | 0     | 4  | 0                 | 0                | 4962.67         | 709.9423 | 7  | 4962.596          | 0.0739        |
| 24                    | 4966.67       | 0            | 0    | 0     | 4  | 0                 | 0                | 4962.67         | 621.3257 | 8  | 4962.606          | 0.0644        |
| 24                    | 4966.67       | 0            | 0    | 0     | 4  | 0                 | 0                | 4962.67         | 993.5145 | 5  | 4962.573          | 0.0975        |
| 24                    | 4966.67       | 0            | 0    | 0     | 4  | 0                 | +18              | 4980.67         | 712.5086 | 7  | 4980.56           | 0.1098        |
| 12                    | 6068.99       | 0            | 0    | 0     | 8  | 0                 | 0                | 6060.99         | 758.2259 | 8  | 6057.807          | 3.1828        |
| 26                    | 4743.48       | 0            | 0    | 0     | 0  | 0                 | 0                | 4743.48         | 792.0848 | 6  | 4746.509          | -3.0288       |
| 32                    | 2988.45       | 0            | 0    | 0     | 4  | 0                 | 0                | 2984.45         | 597.7493 | 5  | 2983.747          | 0.7035        |
| 29                    | 4249.9        | 0            | 0    | 0     | 6  | 0                 | +18              | 4261.9          | 853.5864 | 5  | 4262.932          | -1.032        |
| <b>CAA 15 min</b>     |               |              |      |       |    |                   |                  |                 |          |    |                   |               |
| 1                     | 10800.07      | +256         | +486 | +1584 | -8 | +61               | 0                | 13179.07        | 1465.289 | 9  | 13178.6           | 0.469         |
| 1                     | 10800.07      | +256         | +486 | +1716 | -8 | +32               | 0                | 13282.07        | 1476.736 | 9  | 13281.62          | 0.4487        |
| 1                     | 10800.07      | +256         | +486 | +1716 | -8 | +61               | 0                | 13311.07        | 1479.847 | 9  | 13309.62          | 1.4479        |
| 1                     | 10800.07      | +256         | +486 | +1848 | -8 | +61               | 0                | 13443.07        | 1494.627 | 9  | 13442.64          | 0.4297        |
| 6                     | 7376.5        | +96          | +486 | +1584 | -8 | 0                 | +18              | 9552.5          | 1365.371 | 7  | 9550.596          | 1.9044        |
| 5                     | 7534.66       | +96          | +486 | +1584 | -2 | 0                 | 0                | 9698.66         | 1386.387 | 7  | 9697.712          | 0.9482        |
| 3                     | 7664.61       | +144         | +486 | +1584 | -2 | 0                 | 0                | 9876.61         | 1411.812 | 7  | 9875.681          | 0.9288        |
| 15                    | 5909.78       | 0            | 0    | 0     | -6 | 0                 | 0                | 5903.78         | 985.1312 | 6  | 5904.787          | -1.0072       |

|    |         |   |   |   |    |   |     |         |          |    |          |         |
|----|---------|---|---|---|----|---|-----|---------|----------|----|----------|---------|
| 15 | 5909.78 | 0 | 0 | 0 | -6 | 0 | 0   | 5903.78 | 844.5422 | 7  | 5904.795 | -1.0154 |
| 15 | 5909.78 | 0 | 0 | 0 | -4 | 0 | 0   | 5905.78 | 739.2265 | 8  | 5905.812 | -0.032  |
| 15 | 5909.78 | 0 | 0 | 0 | -4 | 0 | 0   | 5905.78 | 657.2028 | 9  | 5905.825 | -0.0452 |
| 15 | 5909.78 | 0 | 0 | 0 | -4 | 0 | 0   | 5905.78 | 591.6837 | 10 | 5906.837 | -1.057  |
| 24 | 4966.67 | 0 | 0 | 0 | -4 | 0 | 0   | 4962.67 | 709.942  | 7  | 4962.594 | 0.076   |
| 24 | 4966.67 | 0 | 0 | 0 | -4 | 0 | 0   | 4962.67 | 621.3252 | 8  | 4962.602 | 0.0684  |
| 24 | 4966.67 | 0 | 0 | 0 | -4 | 0 | 0   | 4962.67 | 828.0979 | 6  | 4962.587 | 0.0826  |
| 24 | 4966.67 | 0 | 0 | 0 | -4 | 0 | 0   | 4962.67 | 993.5155 | 5  | 4962.578 | 0.0925  |
| 13 | 6028.92 | 0 | 0 | 0 | -4 | 0 | +18 | 6042.92 | 864.4004 | 7  | 6043.803 | -0.8828 |
| 13 | 6028.92 | 0 | 0 | 0 | -4 | 0 | +18 | 6042.92 | 756.6013 | 8  | 6044.81  | -1.8904 |
| 26 | 4743.48 | 0 | 0 | 0 | 0  | 0 | 0   | 4743.48 | 792.0846 | 6  | 4746.508 | -3.0276 |
| 24 | 4966.67 | 0 | 0 | 0 | -4 | 0 | +18 | 4980.67 | 712.5086 | 7  | 4980.56  | 0.1098  |

**Art v 13 h**

|    |          |      |      |       |    |     |     |          |          |    |          |         |
|----|----------|------|------|-------|----|-----|-----|----------|----------|----|----------|---------|
| 1  | 10800.07 | +256 | +486 | +1584 | -8 | +32 | 0   | 13150.07 | 1462.173 | 9  | 13150.56 | -0.4879 |
| 1  | 10800.07 | +256 | +486 | +1716 | -8 | +32 | 0   | 13282.07 | 1476.731 | 9  | 13281.58 | 0.4883  |
| 1  | 10800.07 | +256 | +324 | +1320 | 0  | +32 | 0   | 12732.07 | 1592.427 | 8  | 12731.41 | 0.6556  |
| 1  | 10800.07 | +256 | +324 | +1452 | -4 | +32 | 0   | 12860.07 | 1608.555 | 8  | 12860.44 | -0.3724 |
| 1  | 10800.07 | +256 | +324 | +1584 | -6 | +61 | 0   | 13019.07 | 1628.435 | 8  | 13019.48 | -0.4132 |
| 1  | 10800.07 | +256 | +486 | +1584 | -8 | +32 | 0   | 13150.07 | 1644.693 | 8  | 13149.54 | 0.53    |
| 1  | 10800.07 | +256 | +486 | +1716 | -8 | +32 | 0   | 13282.07 | 1661.198 | 8  | 13281.59 | 0.4844  |
| 3  | 7664.61  | +144 | +486 | +1584 | -2 | 0   | 0   | 9876.61  | 1235.59  | 8  | 9876.718 | -0.1076 |
| 3  | 7664.61  | +144 | +486 | +1584 | -2 | 0   | 0   | 9876.61  | 1411.966 | 7  | 9876.763 | -0.1534 |
| 5  | 7534.66  | +96  | +486 | +1584 | -2 | 0   | 0   | 9698.66  | 1213.211 | 8  | 9697.69  | 0.9704  |
| 5  | 7534.66  | +96  | +486 | +1584 | -2 | 0   | 0   | 9698.66  | 1386.385 | 7  | 9697.696 | 0.9643  |
| 5  | 7534.66  | +96  | +486 | +1584 | -2 | 0   | 0   | 9698.66  | 1617.45  | 6  | 9698.701 | -0.0412 |
| 6  | 7376.5   | +96  | +486 | +1584 | -8 | 0   | +18 | 9552.5   | 1365.664 | 7  | 9552.645 | -0.1452 |
| 6  | 7376.5   | +96  | +486 | +1584 | -8 | 0   | +18 | 9552.5   | 1593.105 | 6  | 9552.628 | -0.1276 |
| 7  | 6906.92  | +32  | +486 | +1584 | -2 | 0   | +18 | 9024.92  | 1505.414 | 6  | 9026.485 | -1.5646 |
| 8  | 6738.72  | +16  | +486 | +1716 | -8 | 0   | +18 | 8966.72  | 1282.061 | 7  | 8967.426 | -0.7056 |
| 8  | 6738.72  | +16  | +486 | +1716 | -8 | 0   | +18 | 8966.72  | 1495.402 | 6  | 8966.412 | 0.308   |
| 15 | 5909.78  | 0    | 0    | 0     | -4 | 0   | 0   | 5905.78  | 985.1311 | 6  | 5904.787 | 0.9934  |
| 15 | 5909.78  | 0    | 0    | 0     | -4 | 0   | 0   | 5905.78  | 844.5419 | 7  | 5904.793 | 0.9867  |
| 15 | 5909.78  | 0    | 0    | 0     | -4 | 0   | 0   | 5905.78  | 739.2262 | 8  | 5905.81  | -0.0296 |
| 15 | 5909.78  | 0    | 0    | 0     | -4 | 0   | 0   | 5905.78  | 657.2021 | 9  | 5905.819 | -0.0389 |
| 15 | 5909.78  | 0    | 0    | 0     | -2 | 0   | 0   | 5907.78  | 591.6827 | 10 | 5906.827 | 0.953   |
| 16 | 5781.65  | 0    | 0    | 0     | -4 | 0   | 0   | 5777.65  | 963.9555 | 6  | 5777.733 | -0.083  |
| 16 | 5781.65  | 0    | 0    | 0     | -4 | 0   | 0   | 5777.65  | 826.2477 | 7  | 5776.734 | 0.9161  |
| 16 | 5781.65  | 0    | 0    | 0     | -4 | 0   | 0   | 5777.65  | 723.2188 | 8  | 5777.75  | -0.1004 |
| 16 | 5781.65  | 0    | 0    | 0     | -4 | 0   | 0   | 5777.65  | 642.9733 | 9  | 5777.76  | -0.1097 |
| 33 | 2859.33  | 0    | 0    | 0     | -2 | 0   | 0   | 2857.33  | 715.4029 | 4  | 2857.612 | -0.2816 |
| 37 | 2500.82  | 0    | 0    | 0     | 0  | 0   | 0   | 2500.82  | 626.6002 | 4  | 2502.401 | -1.5808 |

| CAA 3 h |         |      |      |       |    |   |     |          |          |    |          |         |
|---------|---------|------|------|-------|----|---|-----|----------|----------|----|----------|---------|
| 5       | 7534.66 | +96  | +486 | +1584 | -2 | 0 | 0   | 9698.66  | 1213.465 | 8  | 9699.722 | -1.0624 |
| 5       | 7534.66 | +96  | +486 | +1584 | -2 | 0 | 0   | 9698.66  | 1386.387 | 7  | 9697.71  | 0.9496  |
| 2       | 7863.97 | +96  | +486 | +1584 | -8 | 0 | 0   | 10021.97 | 1253.692 | 8  | 10021.54 | 0.4324  |
| 2       | 7863.97 | +96  | +486 | +1584 | -8 | 0 | 0   | 10021.97 | 1432.504 | 7  | 10020.53 | 1.442   |
| 4       | 7605.74 | +96  | +486 | +1584 | -8 | 0 | 0   | 9763.74  | 1395.658 | 7  | 9762.605 | 1.1354  |
| 4       | 7605.74 | +96  | +486 | +1584 | -8 | 0 | 0   | 9763.74  | 1627.764 | 6  | 9760.582 | 3.1584  |
| 3       | 7664.61 | +144 | +486 | +1584 | -2 | 0 | 0   | 9876.61  | 1411.971 | 7  | 9876.797 | -0.187  |
| 6       | 7376.5  | +96  | +486 | +1584 | -8 | 0 | +18 | 9552.5   | 1365.521 | 7  | 9551.644 | 0.8558  |
| 15      | 5909.78 | 0    | 0    | 0     | -4 | 0 | 0   | 5905.78  | 985.1315 | 6  | 5904.789 | 0.991   |
| 15      | 5909.78 | 0    | 0    | 0     | -4 | 0 | 0   | 5905.78  | 844.5416 | 7  | 5904.791 | 0.9888  |
| 15      | 5909.78 | 0    | 0    | 0     | -4 | 0 | 0   | 5905.78  | 739.2258 | 8  | 5905.806 | -0.0264 |
| 15      | 5909.78 | 0    | 0    | 0     | -4 | 0 | 0   | 5905.78  | 657.3133 | 9  | 5906.82  | -1.0397 |
| 15      | 5909.78 | 0    | 0    | 0     | -4 | 0 | 0   | 5905.78  | 591.6828 | 10 | 5906.828 | -1.048  |
| 16      | 5781.65 | 0    | 0    | 0     | -4 | 0 | 0   | 5777.65  | 963.9561 | 6  | 5777.737 | -0.0866 |
| 16      | 5781.65 | 0    | 0    | 0     | -4 | 0 | 0   | 5777.65  | 826.3914 | 7  | 5777.74  | -0.0898 |
| 16      | 5781.65 | 0    | 0    | 0     | -4 | 0 | 0   | 5777.65  | 723.3437 | 8  | 5778.75  | -1.0996 |
| 16      | 5781.65 | 0    | 0    | 0     | -4 | 0 | 0   | 5777.65  | 643.0845 | 9  | 5778.761 | -1.1105 |
| 20      | 5498.27 | 0    | 0    | 0     | 0  | 0 | 0   | 5498.27  | 917.5296 | 6  | 5499.178 | 0.0976  |
| 10      | 6187.12 | 0    | 0    | 0     | -8 | 0 | 0   | 6179.12  | 883.3083 | 7  | 6176.158 | 2.9619  |
| 13      | 6028.92 | 0    | 0    | 0     | -4 | 0 | +18 | 6042.92  | 864.3995 | 7  | 6043.797 | -0.8765 |
| 37      | 2500.82 | 0    | 0    | 0     | 0  | 0 | 0   | 2500.82  | 626.6011 | 4  | 2502.404 | -1.5844 |

| Art v 1 12h |          |      |      |       |    |     |     |          |          |   |          |         |
|-------------|----------|------|------|-------|----|-----|-----|----------|----------|---|----------|---------|
| 1           | 10800.07 | +256 | +486 | +1716 | -6 | +32 | 0   | 13284.07 | 1661.574 | 8 | 13284.59 | -0.5236 |
| 1           | 10800.07 | +256 | +486 | +1584 | -4 | +61 | 0   | 13183.07 | 1648.821 | 8 | 13182.57 | 0.4996  |
| 1           | 10800.07 | +256 | +324 | +1584 | -6 | +61 | 0   | 13019.07 | 1628.438 | 8 | 13019.5  | -0.434  |
| 1           | 10800.07 | +256 | +324 | +1320 | 0  | +32 | 0   | 12732.07 | 1592.422 | 8 | 12731.38 | 0.6932  |
| 1           | 10800.07 | +256 | +486 | +1584 | -6 | +32 | 0   | 13152.07 | 1462.285 | 9 | 13151.56 | 0.5095  |
| 1           | 10800.07 | +256 | +324 | +1584 | -4 | +61 | 0   | 13021.07 | 1447.713 | 9 | 13020.42 | 0.6512  |
| 5           | 7534.66  | +96  | +486 | +1584 | -2 | 0   | 0   | 9698.66  | 1213.337 | 8 | 9698.697 | -0.0368 |
| 5           | 7534.66  | +96  | +486 | +1584 | -2 | 0   | 0   | 9698.66  | 1386.528 | 7 | 9698.697 | -0.0367 |
| 5           | 7534.66  | +96  | +486 | +1584 | -2 | 0   | 0   | 9698.66  | 1617.45  | 6 | 9698.702 | -0.0418 |
| 3           | 7664.61  | +144 | +486 | +1584 | -2 | 0   | 0   | 9876.61  | 1411.821 | 7 | 9875.75  | 0.8602  |
| 3           | 7664.61  | +144 | +486 | +1584 | 0  | 0   | 0   | 9878.61  | 1647.456 | 6 | 9878.738 | -0.1278 |
| 3           | 7664.61  | +144 | +486 | +1584 | -2 | 0   | 0   | 9876.61  | 1235.597 | 8 | 9876.773 | -0.1628 |
| 6           | 7376.5   | +96  | +486 | +1584 | -8 | 0   | +18 | 9552.5   | 1592.937 | 6 | 9551.62  | 0.8798  |
| 6           | 7376.5   | +96  | +486 | +1584 | -8 | 0   | +18 | 9552.5   | 1365.664 | 7 | 9552.645 | -0.1452 |
| 7           | 6906.92  | +32  | +486 | +1584 | -2 | 0   | +18 | 9024.92  | 1290.208 | 7 | 9024.458 | 0.4619  |
| 8           | 6738.72  | +16  | +486 | +1716 | -8 | 0   | +18 | 8966.72  | 1495.402 | 6 | 8966.41  | 0.3098  |
| 15          | 5909.78  | 0    | 0    | 0     | -4 | 0   | 0   | 5905.78  | 844.6843 | 7 | 5905.79  | -0.0101 |
| 15          | 5909.78  | 0    | 0    | 0     | -8 | 0   | 0   | 5901.78  | 738.3361 | 8 | 5898.689 | 3.0912  |

|    |         |   |   |   |    |   |     |         |          |    |          |         |
|----|---------|---|---|---|----|---|-----|---------|----------|----|----------|---------|
| 15 | 5909.78 | 0 | 0 | 0 | -4 | 0 | 0   | 5905.78 | 657.3129 | 9  | 5906.816 | -1.0361 |
| 15 | 5909.78 | 0 | 0 | 0 | -2 | 0 | 0   | 5907.78 | 591.7828 | 10 | 5907.828 | -0.048  |
| 16 | 5781.65 | 0 | 0 | 0 | -4 | 0 | 0   | 5777.65 | 963.9545 | 6  | 5777.727 | -0.077  |
| 16 | 5781.65 | 0 | 0 | 0 | -4 | 0 | 0   | 5777.65 | 826.3903 | 7  | 5777.732 | -0.0821 |
| 16 | 5781.65 | 0 | 0 | 0 | -4 | 0 | 0   | 5777.65 | 723.3437 | 8  | 5778.75  | -1.0996 |
| 16 | 5781.65 | 0 | 0 | 0 | -4 | 0 | 0   | 5777.65 | 643.0845 | 9  | 5778.761 | -1.1105 |
| 16 | 5781.65 | 0 | 0 | 0 | -2 | 0 | 0   | 5779.65 | 578.9774 | 10 | 5779.774 | -0.124  |
| 19 | 5566.39 | 0 | 0 | 0 | -4 | 0 | 0   | 5562.39 | 928.0989 | 6  | 5562.593 | -0.2034 |
| 19 | 5566.39 | 0 | 0 | 0 | -4 | 0 | 0   | 5562.39 | 795.6579 | 7  | 5562.605 | -0.2153 |
| 19 | 5566.39 | 0 | 0 | 0 | -4 | 0 | 0   | 5562.39 | 696.4522 | 8  | 5563.618 | -1.2276 |
| 19 | 5566.39 | 0 | 0 | 0 | -4 | 0 | 0   | 5562.39 | 619.1811 | 9  | 5563.63  | -1.2399 |
| 12 | 6068.99 | 0 | 0 | 0 | -8 | 0 | 0   | 6060.99 | 758.2274 | 8  | 6057.819 | 3.1708  |
| 27 | 4642.35 | 0 | 0 | 0 | -8 | 0 | 0   | 4634.35 | 773.4057 | 6  | 4634.434 | -0.0842 |
| 29 | 4249.9  | 0 | 0 | 0 | -6 | 0 | +18 | 4261.9  | 853.5849 | 5  | 4262.925 | -1.0245 |
| 31 | 4072.71 | 0 | 0 | 0 | 0  | 0 | 0   | 4072.71 | 1020.049 | 4  | 4076.196 | -3.4864 |

**CAA 12h**

|    |         |      |      |       |    |   |     |         |          |   |          |         |
|----|---------|------|------|-------|----|---|-----|---------|----------|---|----------|---------|
| 6  | 7376.5  | +112 | +486 | +1584 | -6 | 0 | 0   | 9552.5  | 1195.078 | 8 | 9552.626 | -0.1264 |
| 6  | 7376.5  | +112 | +486 | +1584 | -6 | 0 | 0   | 9552.5  | 1365.664 | 7 | 9552.645 | -0.1445 |
| 5  | 7534.66 | +96  | +486 | +1584 | -2 | 0 | 0   | 9698.66 | 1386.384 | 7 | 9697.69  | 0.9699  |
| 5  | 7534.66 | +96  | +486 | +1584 | -2 | 0 | 0   | 9698.66 | 1213.209 | 8 | 9697.672 | 0.988   |
| 5  | 7534.66 | +96  | +486 | +1584 | -2 | 0 | 0   | 9698.66 | 1617.448 | 6 | 9698.688 | -0.028  |
| 3  | 7664.61 | +144 | +486 | +1584 | -2 | 0 | 0   | 9876.61 | 1411.965 | 7 | 9876.754 | -0.1436 |
| 3  | 7664.61 | +144 | +486 | +1584 | -2 | 0 | 0   | 9876.61 | 1235.718 | 8 | 9877.744 | -1.134  |
| 8  | 6738.72 | +16  | +486 | +1716 | -8 | 0 | +18 | 8966.72 | 1495.402 | 6 | 8966.413 | 0.3074  |
| 8  | 6738.72 | +16  | +486 | +1716 | -8 | 0 | +18 | 8966.72 | 1282.063 | 7 | 8967.44  | -0.7196 |
| 16 | 5781.65 | 0    | 0    | 0     | -6 | 0 | 0   | 5775.65 | 963.6167 | 6 | 5775.7   | -0.0502 |
| 16 | 5781.65 | 0    | 0    | 0     | -4 | 0 | 0   | 5777.65 | 826.2444 | 7 | 5776.711 | 0.9392  |
| 16 | 5781.65 | 0    | 0    | 0     | -4 | 0 | 0   | 5777.65 | 723.0901 | 8 | 5776.721 | 0.9292  |
| 16 | 5781.65 | 0    | 0    | 0     | -4 | 0 | 0   | 5777.65 | 642.9705 | 9 | 5777.735 | -0.0845 |
| 15 | 5909.78 | 0    | 0    | 0     | -6 | 0 | 0   | 5903.78 | 984.9598 | 6 | 5903.759 | 0.0212  |
| 15 | 5909.78 | 0    | 0    | 0     | -6 | 0 | 0   | 5903.78 | 844.3957 | 7 | 5903.77  | 0.0101  |
| 15 | 5909.78 | 0    | 0    | 0     | -8 | 0 | 0   | 5901.78 | 738.3355 | 8 | 5898.684 | 3.096   |
| 15 | 5909.78 | 0    | 0    | 0     | -4 | 0 | 0   | 5905.78 | 657.1991 | 9 | 5905.792 | -0.0119 |
| 19 | 5566.39 | 0    | 0    | 0     | -6 | 0 | 0   | 5560.39 | 927.7624 | 6 | 5560.574 | -0.1844 |
| 19 | 5566.39 | 0    | 0    | 0     | -6 | 0 | 0   | 5560.39 | 795.512  | 7 | 5561.584 | -1.194  |
| 19 | 5566.39 | 0    | 0    | 0     | -6 | 0 | 0   | 5560.39 | 696.1993 | 8 | 5561.594 | -1.2044 |
| 12 | 6068.99 | 0    | 0    | 0     | -8 | 0 | 0   | 6060.99 | 758.2245 | 8 | 6057.796 | 3.194   |
| 27 | 4642.35 | 0    | 0    | 0     | -8 | 0 | 0   | 4634.35 | 773.4052 | 6 | 4634.431 | -0.0812 |
| 31 | 4072.71 | 0    | 0    | 0     | 0  | 0 | 0   | 4072.71 | 1020.049 | 4 | 4076.195 | -3.4852 |
| 32 | 2988.45 | 0    | 0    | 0     | -4 | 0 | 0   | 2984.45 | 597.7483 | 5 | 2983.742 | 0.7085  |
| 37 | 2500.82 | 0    | 0    | 0     | 0  | 0 | 0   | 2500.82 | 626.5986 | 4 | 2502.394 | -1.5744 |

| <b>Art v 1 24h</b> |         |      |      |       |    |   |     |         |          |    |          |         |
|--------------------|---------|------|------|-------|----|---|-----|---------|----------|----|----------|---------|
| 6                  | 7376.5  | +96  | +486 | +1584 | -8 | 0 | +18 | 9552.5  | 1195.081 | 8  | 9552.648 | -0.148  |
| 6                  | 7376.5  | +96  | +486 | +1584 | -8 | 0 | +18 | 9552.5  | 1365.661 | 7  | 9552.625 | -0.1249 |
| 6                  | 7376.5  | +96  | +486 | +1584 | -8 | 0 | +18 | 9552.5  | 1592.937 | 6  | 9551.62  | 0.8804  |
| 5                  | 7534.66 | +96  | +486 | +1584 | -2 | 0 | 0   | 9698.66 | 1213.336 | 8  | 9698.686 | -0.0264 |
| 5                  | 7534.66 | +96  | +486 | +1584 | -2 | 0 | 0   | 9698.66 | 1386.526 | 7  | 9698.679 | -0.0192 |
| 5                  | 7534.66 | +96  | +486 | +1584 | -2 | 0 | 0   | 9698.66 | 1617.275 | 6  | 9697.651 | 1.0088  |
| 3                  | 7664.61 | +144 | +486 | +1584 | -4 | 0 | 0   | 9874.61 | 1235.344 | 8  | 9874.755 | -0.1452 |
| 3                  | 7664.61 | +144 | +486 | +1584 | -4 | 0 | 0   | 9874.61 | 1411.961 | 7  | 9876.73  | -2.1198 |
| 3                  | 7664.61 | +144 | +486 | +1584 | -4 | 0 | 0   | 9874.61 | 1647.119 | 6  | 9876.712 | -2.1016 |
| 8                  | 6738.72 | +16  | +486 | +1716 | -8 | 0 | +18 | 8966.72 | 1281.918 | 7  | 8966.424 | 0.2961  |
| 19                 | 5566.39 | 0    | 0    | 0     | -4 | 0 | 0   | 5562.39 | 928.0995 | 6  | 5562.597 | -0.207  |
| 19                 | 5566.39 | 0    | 0    | 0     | -4 | 0 | 0   | 5562.39 | 795.6578 | 7  | 5562.605 | -0.2146 |
| 19                 | 5566.39 | 0    | 0    | 0     | -4 | 0 | 0   | 5562.39 | 696.327  | 8  | 5562.616 | -0.226  |
| 19                 | 5566.39 | 0    | 0    | 0     | -4 | 0 | 0   | 5562.39 | 619.1811 | 9  | 5563.63  | -1.2399 |
| 16                 | 5781.65 | 0    | 0    | 0     | -4 | 0 | 0   | 5777.65 | 963.9545 | 6  | 5777.727 | -0.077  |
| 16                 | 5781.65 | 0    | 0    | 0     | -4 | 0 | 0   | 5777.65 | 826.3905 | 7  | 5777.734 | -0.0835 |
| 16                 | 5781.65 | 0    | 0    | 0     | -4 | 0 | 0   | 5777.65 | 723.2192 | 8  | 5777.754 | -0.1036 |
| 16                 | 5781.65 | 0    | 0    | 0     | -4 | 0 | 0   | 5777.65 | 643.084  | 9  | 5778.756 | -1.106  |
| 12                 | 6068.99 | 0    | 0    | 0     | -8 | 0 | 0   | 6060.99 | 758.2253 | 8  | 6057.802 | 3.1876  |
| 21                 | 5411.2  | 0    | 0    | 0     | -4 | 0 | 0   | 5407.2  | 773.4057 | 7  | 5406.84  | 0.3601  |
| 18                 | 5595.39 | 0    | 0    | 0     | -2 | 0 | +18 | 5611.39 | 802.8633 | 7  | 5613.043 | -1.6531 |
| 29                 | 4249.9  | 0    | 0    | 0     | -6 | 0 | +18 | 4261.9  | 853.5849 | 5  | 4262.925 | -1.0245 |
| 31                 | 4072.71 | 0    | 0    | 0     | 0  | 0 | 0   | 4072.71 | 1020.05  | 4  | 4076.198 | -3.488  |
| <b>CAA 24h</b>     |         |      |      |       |    |   |     |         |          |    |          |         |
| 9                  | 6218.11 | +32  | +486 | +1716 | -2 | 0 | 0   | 8450.11 | 939.9722 | 9  | 8450.75  | -0.6398 |
| 9                  | 6218.11 | +32  | +486 | +1716 | -2 | 0 | 0   | 8450.11 | 846.075  | 10 | 8450.75  | -0.64   |
| 9                  | 6218.11 | +32  | +486 | +1716 | -2 | 0 | 0   | 8450.11 | 705.1479 | 12 | 8449.775 | 0.3352  |
| 9                  | 6218.11 | +32  | +486 | +1716 | -2 | 0 | 0   | 8450.11 | 769.2504 | 11 | 8450.754 | -0.6444 |
| 19                 | 5566.39 | 0    | 0    | 0     | -6 | 0 | 0   | 5560.39 | 927.7628 | 6  | 5560.577 | -0.1868 |
| 19                 | 5566.39 | 0    | 0    | 0     | -6 | 0 | 0   | 5560.39 | 795.369  | 7  | 5560.583 | -0.193  |
| 19                 | 5566.39 | 0    | 0    | 0     | -6 | 0 | 0   | 5560.39 | 696.1997 | 8  | 5561.598 | -1.2076 |
| 19                 | 5566.39 | 0    | 0    | 0     | -6 | 0 | 0   | 5560.39 | 618.9562 | 9  | 5561.606 | -1.2158 |
| 27                 | 4642.35 | 0    | 0    | 0     | -6 | 0 | 0   | 4636.35 | 580.3055 | 8  | 4634.444 | 1.906   |
| 34                 | 2811.18 | 0    | 0    | 0     | -2 | 0 | 0   | 2809.18 | 562.3026 | 5  | 2806.513 | 2.667   |
| 36                 | 2515.84 | 0    | 0    | 0     | 0  | 0 | 0   | 2515.84 | 630.086  | 4  | 2516.344 | -0.504  |
| 35                 | 2606.99 | 0    | 0    | 0     | 0  | 0 | 0   | 2606.99 | 653.1136 | 4  | 2608.454 | -1.4644 |
| 31                 | 4072.71 | 0    | 0    | 0     | 0  | 0 | 0   | 4072.71 | 1020.054 | 4  | 4076.214 | -3.504  |
| <b>Art v 1 48h</b> |         |      |      |       |    |   |     |         |          |    |          |         |
| 14                 | 6006.85 | +16  | +486 | +1584 | -6 | 0 | +18 | 8104.85 | 1158.918 | 7  | 8105.425 | -0.5753 |
| 11                 | 6077.23 | +16  | +486 | +1584 | -2 | 0 | +18 | 8179.23 | 1023.563 | 8  | 8180.502 | -1.2724 |

|    |         |     |      |       |    |   |     |         |          |    |          |         |
|----|---------|-----|------|-------|----|---|-----|---------|----------|----|----------|---------|
| 11 | 6077.23 | +16 | +486 | +1584 | -2 | 0 | +18 | 8179.23 | 909.9457 | 9  | 8180.511 | -1.2813 |
| 11 | 6077.23 | +16 | +486 | +1584 | -2 | 0 | +18 | 8179.23 | 819.0518 | 10 | 8180.518 | -1.288  |
| 11 | 6077.23 | +16 | +486 | +1584 | -2 | 0 | +18 | 8179.23 | 744.6841 | 11 | 8180.525 | -1.2951 |
| 19 | 5566.39 | 0   | 0    | 0     | -6 | 0 | 0   | 5560.39 | 927.5929 | 6  | 5559.557 | 0.8326  |
| 19 | 5566.39 | 0   | 0    | 0     | -6 | 0 | 0   | 5560.39 | 795.2237 | 7  | 5559.566 | 0.8241  |
| 19 | 5566.39 | 0   | 0    | 0     | -6 | 0 | 0   | 5560.39 | 619.066  | 9  | 5562.594 | -2.204  |
| 22 | 5350.09 | 0   | 0    | 0     | -6 | 0 | 0   | 5344.09 | 891.5772 | 6  | 5343.463 | 0.6268  |
| 22 | 5350.09 | 0   | 0    | 0     | -6 | 0 | 0   | 5344.09 | 764.4962 | 7  | 5344.473 | -0.3834 |
| 29 | 4249.9  | 0   | 0    | 0     | -6 | 0 | +18 | 4261.9  | 853.5825 | 5  | 4262.913 | -1.0125 |

---

**CAA 48h**

---

|    |         |   |   |   |    |   |   |         |          |   |          |         |
|----|---------|---|---|---|----|---|---|---------|----------|---|----------|---------|
| 17 | 5626.45 | 0 | 0 | 0 | -2 | 0 | 0 | 5624.45 | 938.4261 | 6 | 5624.557 | -0.1066 |
| 19 | 5566.39 | 0 | 0 | 0 | -6 | 0 | 0 | 5560.39 | 927.7628 | 6 | 5560.577 | -0.1868 |
| 19 | 5566.39 | 0 | 0 | 0 | -6 | 0 | 0 | 5560.39 | 795.3692 | 7 | 5560.584 | -0.1944 |
| 19 | 5566.39 | 0 | 0 | 0 | -6 | 0 | 0 | 5560.39 | 696.2    | 8 | 5561.6   | -1.21   |
| 19 | 5566.39 | 0 | 0 | 0 | -6 | 0 | 0 | 5560.39 | 618.9585 | 9 | 5561.627 | -1.2365 |
| 22 | 5350.09 | 0 | 0 | 0 | -6 | 0 | 0 | 5344.09 | 891.7455 | 6 | 5344.473 | -0.383  |
| 23 | 5220.97 | 0 | 0 | 0 | -6 | 0 | 0 | 5214.97 | 870.2377 | 6 | 5215.426 | -0.4562 |
| 23 | 5220.97 | 0 | 0 | 0 | -6 | 0 | 0 | 5214.97 | 746.0624 | 7 | 5215.437 | -0.4668 |
| 23 | 5220.97 | 0 | 0 | 0 | -6 | 0 | 0 | 5214.97 | 1043.878 | 5 | 5214.391 | 0.579   |
| 25 | 4904.62 | 0 | 0 | 0 | -6 | 0 | 0 | 4898.62 | 817.3741 | 6 | 4898.245 | 0.3754  |
| 25 | 4904.62 | 0 | 0 | 0 | -4 | 0 | 0 | 4900.62 | 980.849  | 5 | 4899.245 | 1.375   |
| 28 | 4442.06 | 0 | 0 | 0 | -2 | 0 | 0 | 4440.06 | 635.1709 | 7 | 4439.196 | 0.8637  |
| 30 | 4125.71 | 0 | 0 | 0 | -4 | 0 | 0 | 4121.71 | 825.5979 | 5 | 4122.99  | -1.2795 |



**Table S3.** Identified peptides released during 15 min, 3, 12, 24 and 48 h of endolysosomal processing of Art v 1(A) and CAA (C).

|    | A15' | C15' | A3h | C3h | A12h | C12h | A24h | C24h | A48h | C48h |
|----|------|------|-----|-----|------|------|------|------|------|------|
| 1  | 1    | 1    | 1   |     | 1    |      |      |      |      |      |
| 2  |      |      |     | 2   |      |      |      |      |      |      |
| 3  |      | 3    | 3   | 3   | 3    | 3    | 3    |      |      |      |
| 4  |      |      |     | 4   |      |      |      |      |      |      |
| 5  |      | 5    | 5   | 5   | 5    | 5    | 5    |      |      |      |
| 6  |      | 6    | 6   | 6   | 6    | 6    | 6    |      |      |      |
| 7  |      |      | 7   |     | 7    |      |      |      |      |      |
| 8  |      |      | 8   |     | 8    | 8    | 8    |      |      |      |
| 9  |      |      |     |     |      |      |      | 9    |      |      |
| 10 |      |      |     | 10  |      |      |      |      |      |      |
| 11 |      |      |     |     |      |      |      |      | 11   |      |
| 12 | 12   |      |     |     | 12   | 12   | 12   |      |      |      |
| 13 |      | 13   |     | 13  |      |      |      |      |      |      |
| 14 |      |      |     |     |      |      |      |      | 14   |      |
| 15 | 15   | 15   | 15  | 15  | 15   | 15   |      |      |      |      |
| 16 |      |      | 16  | 16  | 16   | 16   | 16   |      |      |      |
| 17 |      |      |     |     |      |      |      |      |      | 17   |
| 18 |      |      |     |     |      |      | 18   |      |      |      |
| 19 |      |      |     |     | 19   | 19   | 19   | 19   | 19   | 19   |
| 20 |      |      |     | 20  |      |      |      |      |      |      |
| 21 |      |      |     |     |      |      | 21   |      |      |      |
| 22 |      |      |     |     |      |      |      |      | 22   | 22   |
| 23 |      |      |     |     |      |      |      |      |      | 23   |
| 24 | 24   | 24   |     |     |      |      |      |      |      |      |
| 25 |      |      |     |     |      |      |      |      |      | 25   |
| 26 | 26   | 26   |     |     |      |      |      |      |      |      |
| 27 |      |      |     |     | 27   | 27   |      | 27   |      |      |
| 28 |      |      |     |     |      |      |      |      |      | 28   |
| 29 | 29   |      |     |     | 29   |      | 29   |      | 29   |      |
| 30 |      |      |     |     |      |      |      |      |      | 30   |
| 31 |      |      |     |     | 31   | 31   | 31   | 31   |      |      |
| 32 | 32   |      |     |     |      | 32   |      |      |      |      |
| 33 |      |      | 33  |     |      |      |      |      |      |      |
| 34 |      |      |     |     |      |      |      | 34   |      |      |
| 35 |      |      |     |     |      |      |      | 35   |      |      |
| 36 |      |      |     |     |      |      |      | 36   |      |      |
| 37 |      |      | 37  | 37  |      | 37   |      |      |      |      |

## References

- (1) Himly, M.; Jahn-Schmid, B.; Dedic, A.; Kelemen, P.; Wopfner, N.; Altmann, F.; van Ree, R.; Briza, P.; Richter, K.; Ebner, C.; Ferreira, F. Art v 1, the major allergen of mugwort pollen, is a modular glycoprotein with a defensin-like and a hydroxyproline-rich domain. *Faseb Journal* **2002**, *16*, 106-108.
- (2) Leonard, R., Petersen, B. O., Himly, M., Kaar, W., Wopfner, N., Kolarich, D., van Ree, R., Ebner, C., Duus, J. O., Ferreira, F.; & Altmann, F. Two novel types of O-glycans on the mugwort pollen allergen Art v 1 and their role in antibody binding. *J. Biol. Chem.* **2005**, *280*(9), 7932-7940.
